# 1 Protein Domain-Based Prediction of Compound–Target Interactions and 2 Experimental Validation on LIM Kinases

3 Tunca Doğan<sup>1,2,3,\*</sup>, Ece Akhan Güzelcan<sup>3,4</sup>, Marcus Baumann<sup>5</sup>, Altay Koyas<sup>3</sup>, Heval Atas<sup>3</sup>, Ian  
4 Baxendale<sup>6</sup>, Maria Martin<sup>7</sup> and Rengul Cetin-Atalay<sup>3,8,\*</sup>

5 <sup>1</sup> Department of Computer Engineering, Hacettepe University, 06800 Ankara, Turkey

6 <sup>2</sup> Institute of Informatics, Hacettepe University, 06800 Ankara, Turkey

7 <sup>3</sup> CanSyL, Graduate School of Informatics, Middle East Technical University, 06800 Ankara, Turkey

8 <sup>4</sup> Center for Genomics and Rare Diseases & Biobank for Rare Diseases, Hacettepe University, 06230  
9 Ankara, Turkey

10 <sup>5</sup> School of Chemistry, University College Dublin, D04 N2E2 Dublin, Ireland

11 <sup>6</sup> Department of Chemistry, University of Durham, DH1 3LE Durham, UK

12 <sup>7</sup> European Molecular Biology Laboratory, European Bioinformatics Institute (EMBL-EBI), Wellcome  
13 Trust Genome Campus, CB10 1SD Hinxton, Cambridge, UK

14 <sup>8</sup> Section of Pulmonary and Critical Care Medicine, University of Chicago, Chicago IL, 60637, USA

15 \* To whom correspondence should be addressed.

16 E-mail: [tuncadogan@hacettepe.edu.tr](mailto:tuncadogan@hacettepe.edu.tr) & [rengul@uchicago.edu](mailto:rengul@uchicago.edu)

## 17 Abstract

18 Predictive approaches such as virtual screening have been used in drug discovery with the  
19 objective of reducing developmental time and costs. Current machine learning and network-  
20 based approaches have issues related to generalization, usability, or model interpretability,  
21 especially due to the complexity of target proteins' structure/function, and bias in system  
22 training datasets. Here, we propose a new computational method “DRUIDom” to predict bio-  
23 interactions between drug candidate compounds and target proteins by utilizing the domain  
24 modularity of proteins, to overcome problems associated with current approaches.  
25 DRUIDom is composed of two methodological steps. First, ligands/compounds are  
26 statistically mapped to structural domains of their target proteins, with the aim of identifying  
27 physical or functional interactions. As such, other proteins containing the mapped domain or

28 domain pair become new candidate targets for the corresponding compounds. Next, a  
29 million-scale dataset of small molecule compounds, including the ones mapped to domains  
30 in the previous step, are clustered based on their molecular similarities, and their domain  
31 associations are propagated to other compounds within the same clusters. Experimentally  
32 verified bioactivity data points, obtained from public databases, are meticulously filtered to  
33 construct datasets of active/interacting and inactive/non-interacting compound–target pairs  
34 (~2.9M data points), and used as training data for calculating parameters of compound–  
35 domain mappings, which led to 27,032 high-confidence associations between 250 domains  
36 and 8,165 compounds, and a finalized output of ~5 million new compound–protein  
37 interactions. DRUIDom is experimentally validated by syntheses and bioactivity analyses of  
38 compounds predicted to target LIM-kinase proteins, which play critical roles in the regulation  
39 of cell motility, cell cycle progression, and differentiation through actin filament dynamics.  
40 We showed that LIMK-inhibitor-2 and its derivatives significantly block the cancer cell  
41 migration through inhibition of LIMK phosphorylation and the downstream protein cofilin.  
42 One of the derivative compounds (LIMKi-2d) was identified as a promising candidate due to  
43 its action on resistant Mahlavu liver cancer cells. The results demonstrated that DRUIDom  
44 can be exploited to identify drug candidate compounds for intended targets and to predict  
45 new target proteins based on the defined compound–domain relationships. The datasets,  
46 results, and the source code of DRUIDom are fully-available at:  
47 <https://github.com/cansyl/DRUIDom>.

## 48 **Author Summary**

49 Drug development comprises several interlinked steps from designing drug candidate  
50 molecules to running clinical trials, with the aim to bring a new drug to market. A critical yet  
51 costly and labor-intensive stage is drug discovery, in which drug candidate molecules that  
52 specifically interact with the intended biomolecular target (mostly proteins) are identified.  
53 Lately, data-centric computational methods have been proposed to aid experimental  
54 procedures in drug discovery. These methods have the ability to rapidly assess large

55 molecule libraries and reduce the time and cost of the process; however, most of them suffer  
56 from problems related to producing reliable biologically relevant results, preventing them  
57 from gaining real-world usage. Here, we have developed a new method called DRUIDom to  
58 predict unknown interactions between drugs/drug candidate compounds and biological  
59 targets by utilizing the modular structure of proteins. For this, we identify the domains, i.e.,  
60 the evolutionary and functional building blocks of proteins, where these potential drug  
61 compounds can bind, and utilize this information along with protein domain annotations to  
62 predict new drug targets. We have tested the biological relevance of DRUIDom on selected  
63 proteins that play critical roles in the progression of numerous types of cancer. Cell-based  
64 experimental results indicated that predicted inhibitors are effective even on drug-resistant  
65 cancer cells. Our results suggest that DRUIDom produces novel and biologically relevant  
66 results that can be directly used in the early steps of the drug discovery process.

67

## 68 **1. Introduction**

69 Drug development is an expensive and lengthy process, the cost of developing a new drug  
70 in the USA has been estimated at about \$1.8 billion and it takes on average 13 years [1].  
71 One of the major factors affecting the cost is the attrition rate of drug candidates in late-  
72 stage development due to unexpected side effects and toxicity problems, arising from  
73 previously unknown off-target interactions [2]. Indeed, the identification of molecular  
74 interactions between drug compounds and the intended target biomolecule(s) is the key to  
75 understanding and generating improved molecular designs leading to greater specificity. In  
76 the last decades, systematic high throughput screening (HTS) of large collections of  
77 chemical compounds has been widely utilized with the purpose of efficient lead identification,  
78 as well as efficacy evaluation and toxicity assessment [3]. Despite its advantages over  
79 previous strategies, HTS is an expensive technique that can only be afforded by big pharma.  
80 Furthermore, considering the combinations between millions of small molecule drug

81 candidate compounds and thousands of potential protein targets, the combinatorial number  
82 of experiments is extremely high, which is not possible to experimentally evaluate.

83 Over the last two decades, computational approaches have been developed with the  
84 objective of aiding experimental studies in drug discovery, defining a new field entitled  
85 "virtual screening" or "drug/compound – target protein interaction (DTI) prediction" [4-6].  
86 Here, the aim is to predict unknown compound – target interactions with the construction  
87 and application of statistical models, using various types of molecular descriptors [7]. There  
88 are two distinct approaches to virtual screening. In the ligand-based approach, new chemical  
89 substances are predicted as binders of the intended target biomolecules. This is usually  
90 done by calculating molecular similarities between the drug/compound that is known to  
91 interact with the intended protein and other chemical substances in the library, thus,  
92 returning the most similar ones as predictions via “guilt by association” [8]. Since the  
93 predicted ligands of a target are usually limited to the compounds that are highly similar to its  
94 known ligands, discovering new scaffolds is difficult with this approach. In structure-based  
95 virtual screening methods, 3-D structural information of known ligand – receptor complexes  
96 are used to model the interactions and predict new DTIs with similar interactive properties  
97 [9]. Structure-based virtual screening is a costly process due to both highly intensive  
98 computational processes and challenges associated with obtaining 3-D structures of both  
99 protein and receptor-ligand complexes [2]. As a result, they are mostly limited to the well-  
100 characterized portion of the target protein space. New computational approaches have  
101 emerged to address these issues by adopting machine learning and/or network analysis  
102 techniques [10-14]. There are cases where the drug candidate compounds, first discovered  
103 by virtual screening, or via computer-aided drug discovery in general, became approved  
104 drugs [4,15].

105 DTI prediction methods usually require large training datasets (i.e., experimentally verified  
106 interaction information between compounds and proteins), to build accurate models.  
107 Bioactivity databases such as PubChem [16] and ChEMBL [17] curate and publish *in vitro*

108 and *in vivo* bioassays, in the form of compound – target bioactivity measurements, which are  
109 used by DTI predictors as training data. The open-access data presented in these resources  
110 are extremely valuable for the research community; however, it is still difficult to find data  
111 concerning less-studied targets, which prevents building predictive models for these less  
112 common targets. Besides, the information in these databases is typically incomplete,  
113 meaning that there are many unknown interactions for the compounds and the targets  
114 presented in these resources, an aspect that is especially critical for estimating the off-target  
115 effects of the drug candidate compounds. Nevertheless, computational predictions  
116 concerning under-studied targets and never-before-targeted proteins is an important topic  
117 that may help researchers to assess the druggability of these proteins and develop new  
118 therapeutic approaches.

119 Modelling the interaction between compounds and proteins is a difficult task especially due  
120 to the fact that molecular interactions between proteins and compounds are complex, also,  
121 many proteins expressed by the human genome are yet to be structurally characterized. In  
122 this sense, it is critical to reduce the complexity to a level where the modelling is feasible, the  
123 required data is available at large scale and the results produced are biologically relevant.  
124 Proteins have modular structures made up of functional building blocks called domains.  
125 Domains can fold, function, and evolve independently from the rest of the protein [18].  
126 Protein regions that correspond to domains are evolutionarily highly conserved since  
127 mutations in these functionally critical regions may lead to adverse consequences for the  
128 organism. Once they are identified on the structures of characterized proteins, domains can  
129 be detected (i.e., predicted) on structurally uncharacterized proteins by constructing domain  
130 sequence profiles and by searching for these profiles on the amino acid sequences of  
131 uncharacterized proteins [19,20]. Thanks to this application, domain/family annotation  
132 coverage is considerably high on the documented protein sequence space in the UniProt  
133 Knowledgebase (UniProtKB), i.e., 96.7% for UniProtKB/Swiss-Prot and 81.3% for  
134 UniProtKB/TrEMBL. A few literature studies have investigated the relationship between

135 domains and small molecules within the perspective of drug discovery and repositioning. For  
136 instance, Li *et al.* characterized the experimentally known binding interactions between  
137 domains and small molecules using data from Protein Data Bank (PDB). Consequently, they  
138 constructed a drug-domain network and used this to interpret modules of similar ligands and  
139 domains [21]. Kruger *et al.* proposed a simple heuristic to map Pfam domains to small  
140 molecules using ChEMBL bioactivity data as the source. The authors investigated the  
141 structural relevance of the idea of mapping domains to Pfam profiles with statistical tests and  
142 concluded that their heuristic produced accurate results [22,23]. In a recent study, Kobren  
143 and Singh identified interactions between Pfam family/domain entries and various types of  
144 ligands using PDB co-complex structures. Their system InteracDome, employs the positional  
145 correspondence between Pfam HMMs and amino acid sequences of the protein chains in  
146 PDB structures, together with known ligand-binding regions on the same protein chains, to  
147 predict the interacting receptor-ligand pairs [24]. Despite generating highly accurate  
148 mappings, InteracDome's coverage is limited on the small molecule ligand side due to its  
149 reliance on PDB co-complex structures. These studies laid the foundation for the idea of  
150 associating small molecule binding to protein domains but they have neither proposed a  
151 complete end-to-end prediction pipeline, nor leveraged the advantage of using large-scale  
152 experimental bioactivity data accumulated in public databases such as PubChem and  
153 ChEMBL. Consequently, there is a clear requirement for new computational DTI prediction  
154 methods/tools, capable of producing reliable and consistent results by using all available  
155 data in data resources to aid experimental procedures in the field of drug discovery and  
156 repositioning.

157 In this study, we propose a new computational method called DRUIDom (DRUG Interacting  
158 Domain prediction) for the comprehensive prediction of interactions between drugs/drug-like  
159 compounds and target proteins to aid experimental and computational research in drug  
160 discovery and repositioning. DRUIDom is based on associating compounds (i.e., small  
161 molecule ligands) with complementary protein domains. The assumption behind the

162 mapping between domains and compounds is that, either the binding region of the ligand is  
163 on the mapped structural domain(s), or there is a functional relationship between the two, so  
164 that the mapped domain is required for the corresponding bioactivity to occur. Consequently,  
165 it is highly probable that other proteins containing the mapped domain (or combination of  
166 domains) will possess the required structural/functional properties to interact with the  
167 compound of interest. DRUIDom employs a supervised modelling approach, where the  
168 manually curated DTI information in ChEMBL and PubChem databases are used in  
169 combination with the protein sequence and annotation information in the UniProtKB [25] and  
170 the InterPro databases [20], for the construction of the predictive model. The resulting  
171 predictions cover compound and human target protein spaces recorded in the above-listed  
172 data repositories. In DRUIDom, we also evaluated compound to domain pair mappings, in  
173 order to account for the cases where multiple domains are required for the intended ligand  
174 interaction.

175 Our focus here was developing a complete chemogenomics-based drug/compound – target  
176 protein interaction prediction system with a global perspective without focusing on certain  
177 target families. For this, we constructed a large source bioactivity dataset and applied a  
178 scoring-based heuristic to generate the compound – domain associations, which are then  
179 propagated to other drug-like compounds and potential target proteins in the massive  
180 chemogenomics space to produce DTI predictions at large scale. We believe this study will  
181 provide valuable information for estimating both novel on-target and off-target effects of  
182 drugs and drug candidate compounds.

183 With the aim of validating DRUIDom, we selected the PI3K/AKT/mTOR signalling pathway  
184 for our experimental use-case study. PI3K/AKT/mTOR pathway is altered during the  
185 progression of various cancer types [26]. Therefore, it is therapeutically relevant to target  
186 this pathway. In this sense, we analyzed interacting compound predictions for  
187 PI3K/AKT/mTOR pathway proteins, resulting in 116 novel ligand predictions for four targets  
188 (i.e., MDM2, VEGFA, LIMK1, and LIMK2).



189 The invasiveness of cancer cells is based on the changes in control mechanisms that  
190 regulate cytoskeletal remodeling and cell migration. LIMK proteins (i.e., serine/threonine-  
191 protein kinases) play important roles in metastasis by phosphorylating cofilin proteins which  
192 are involved in the dynamic remodeling of actin filaments [27]. Recent studies have shown  
193 that inhibition of LIMKs, combined with other kinase inhibitors, is effective for various tumor  
194 cells in terms of decreasing their proliferative and metastatic features [28]. LIMKs are  
195 required for the collective invasion by taking roles in invadopodium formation and  
196 extracellular matrix degradation in cancer cells [29,30]. It has been reported that an  
197 overexpressed LIMK1 in breast and prostate cancer cells resulted in increased cell motility,  
198 and invasion capacity was attenuated when the inhibitors of upstream regulators of LIMKs  
199 are administered [31]. Therefore, we focused on LIMK1 and LIMK2 proteins for the *in vitro*  
200 experimental validation of the proposed method. We synthesized both the 4 initially  
201 predicted compounds and their 4 novel derivatives. The bioactivities of these small molecule  
202 compounds were analyzed on transformed normal cells and cancer cell lines. The results of  
203 these experimental assays, which are described in the following sections, validated the  
204 computational predictions and indicate potential novel inhibitors for LIMK1 and LIMK2  
205 proteins that can be further investigated for their anti-migratory effects.

206

## 207 **2. Results**

208 Our source/training dataset is composed of 2,869,943 drug/compound – target protein pair  
209 data points (1,637,599 actives and 1,232,344 inactives) between 1,033,581 compounds and  
210 3,644 target proteins. Using drug/compound – target associations contained in this dataset,  
211 we first mapped compounds to domains, then, we produced DTI predictions by propagating  
212 mappings to new compounds and new proteins (Figure 1). Detailed information about the  
213 procedure is given under 4.2.1 of the Methods section. Below, we first explained the  
214 conducted main test together with its results (section 2.1), serving both as a guide to



215 determine the mapping parameters/thresholds and as a predictive performance analysis of  
216 DRUIDom. This is followed by the detailed analysis of compound – domain pair mappings in  
217 comparison with single domain mappings (section 2.2), large-scale production of new  
218 drug/compound – target protein interaction predictions (section 2.3), a validation use-case  
219 study on hepatocellular carcinoma disease (section 2.4) with molecular docking of selected  
220 novel inhibitor predictions for LIMK proteins as an *in silico* validation of DRUIDom (section  
221 2.4.1), and the wet-lab *in vitro* analysis of LIMK inhibition with the treatment of predicted  
222 inhibitors via chemical syntheses and cell-based assays (section 2.4.2).

223 **Figure 1. (a)** The overall representation of the drug/compound – target protein interaction  
224 prediction approach used in DRUIDom (the diagram only depicts the relationship in terms of  
225 physical binding; however, DRUIDom also covers functional relationships between domains  
226 and compounds); **(b)** drug/compound – domain mapping procedure and its scoring over two  
227 representative ( $c_1$ ,  $c_2$ ) toy examples.

## 228 **2.1 Predictive Performance Analysis**

229 The performance of DRUIDom was measured over the success of the mappings between  
230 the compounds and domains, since compound – domain mappings are at the core of the  
231 whole predictive process. As the reference benchmark (i.e., performance test) dataset,  
232 experimentally identified binding between proteins and small molecule compounds (i.e., co-  
233 complex structures) has been employed. For this, we used InteracDome (the non-redundant  
234 representable list - v0.3) mappings [24] as our reference (i.e., gold-standard / benchmark)  
235 dataset, and calculated the performance of our compound – domain mapping procedure, for  
236 arbitrarily selected mapping score threshold values. In the InteracDome representable non-  
237 redundant set, there are 15,593 high-quality mappings indicating the interactions between  
238 2,375 Pfam family/domain entries and 1,522 drug-like small molecules. It is important to note  
239 that InteracDome focuses on the cases of physical binding, whereas we aimed to account  
240 for both physical and functional relationships between domains and small molecule

241 compounds. The main reasons behind using InteracDome as the reference dataset for the  
242 performance analysis of DRUIDom was first, cases of physical binding obtained from PDB  
243 are reliable, and second, there is no ground-truth/reference dataset for functional  
244 relationships between domains and small molecule ligands, as far as we are aware.

245 To prepare the performance analysis dataset, we first extracted the intersecting domain  
246 entries and compounds between the InteracDome benchmark and our source bioactivity  
247 dataset, to carry out the performance analysis on the intersecting set. Out of the total 2,375  
248 Pfam family/domain entries in the InteracDome, 1,043 were included in the target proteins in  
249 our source dataset, and thus, constitute the intersecting domain set. Pfam-InterPro entry  
250 relationships were used for the conversion from Pfam to InterPro. Two main contributing  
251 factors to the reduced intersecting domain set are, we only used domain type entries in  
252 InterPro (leaving family type entries out since there is no structural correspondence to family  
253 entries), whereas InteracDome included family type entries along with domains; and second,  
254 there were several Pfam entries without any correspondence in InterPro and many InterPro  
255 entries without corresponding Pfam signatures. Out of 1,522 compounds in the non-  
256 redundant representable InteracDome dataset, a total of 1,144 were included in our  
257 mappings, and thus, constitute the intersecting compounds set. The main reason behind the  
258 difference in numbers is that many of the ligands in the InteracDome were not drug-like  
259 small molecules; whereas, in our mappings, all of the ligands/compounds were drug-like, as  
260 they were obtained from ChEMBL and PubChem. Next, we extracted all compound –  
261 domain pairs in InteracDome that include the intersecting compounds and domains.

262 Following the construction of the finalized benchmark dataset, we compared our compound  
263 – domain mappings constructed at different mapping score thresholds with the benchmark  
264 mappings, to observe what portion of the benchmark mappings can be retrieved. Thresholds  
265 were applied on the performance scores of our mappings, calculation of which are described  
266 in the Methods section 4.2.1. Thus, a threshold of 0.7 means all compound – domain  
267 mappings with a mapping score recall, precision, accuracy, and F1-score less than 0.7 are

268 discarded. At each threshold, if a compound – domain pair in the benchmark dataset is also  
269 retrieved in our mappings, it is counted as a true positive (TP). If a benchmark pair could not  
270 be retrieved in our mappings, it is counted as a false negative (FN). If a pair in our mappings  
271 could not be found in the benchmark dataset, it is counted as a false positive (FP). Finally, if  
272 a potential compound – domain pair could not be found both in our mappings and in the  
273 benchmark dataset, it is counted as a true negative (TN).

274 Table 1 displays the results of the compound – domain mapping performance analysis. As  
275 shown, performance increases with the increasing mapping score thresholds; however, the  
276 coverage of the mappings, with respect to InteracDome, decreases simultaneously. This  
277 was expected since increasing the confidence thresholds eliminates more and more  
278 compound – domain mappings from our set, but the remaining mappings are more reliable.  
279 The coverage can be considered low even with the lowest confidence score threshold (i.e.,  
280 coverage for ligands: 31% and for domains: 16.5%) due to the fact that experimental data  
281 sources behind InteracDome and our mappings are different from each other (i.e., co-crystal  
282 structures and measured bioactivities, respectively). Since the performance was calculated  
283 considering the intersecting compounds and domains at each score threshold, the  
284 performance gradually increases with the increasing threshold, in terms of all metrics. Both  
285 the ligand and domain coverage, at the score threshold (0.9) that yielded the highest  
286 performance, was around 1% of the InteracDome. Considering the trade-off between  
287 coverage and performance, we selected the confidence threshold of 0.5, which provided an  
288 acceptable performance (i.e., accuracy: 0.95 and MCC: 0.78) and an InteracDome coverage  
289 of compounds: ~5% and domains: ~6%. At this score threshold, our approach produced  
290 27,032 mappings between 250 domains and 8,165 compounds/ligands. It is also important  
291 to check the coverage extensions yielded by our mappings over the InteracDome, which  
292 corresponds to the percentage of new domains and new ligands added to the mapping set.  
293 These new ligands and domains were not presented in the InteracDome dataset. For the  
294 selected confidence threshold (0.5), our mappings enriched the InteracDome dataset by

295 ~19% for domains and ~707% for ligands. The extended coverage values indicate the  
 296 added value of our approach. In this study, all of the steps followed after this point were  
 297 carried out using the mapping set generated with the mapping score threshold of 0.5.  
 298 However, in order to allow users to select other score thresholds, we have also shared a file  
 299 in our repository that includes raw/non-filtered compound – domain mappings together with  
 300 their mapping scores.

301 **Table 1.** Compound – domain mapping performance analysis results.

| Mapping score threshold | # of retrieved: |            |              | Domain coverage (% of Interac Dome) | Compound coverage (% of Interac Dome) | Domain coverage extension (% of Interac Dome) | Compound coverage extension (% of Interac Dome) | Performance analysis results |           |          |            |             |             |             |             |             |
|-------------------------|-----------------|------------|--------------|-------------------------------------|---------------------------------------|-----------------------------------------------|-------------------------------------------------|------------------------------|-----------|----------|------------|-------------|-------------|-------------|-------------|-------------|
|                         | Mappings        | Domains    | Compounds    |                                     |                                       |                                               |                                                 | TP                           | FP        | FN       | TN         | Recall      | Precision   | Accuracy    | F1-Score    | MCC         |
| 0                       | 3,245,943       | 1,018      | 215,432      | 31.0                                | 16.5                                  | 66.6                                          | 18814.9                                         | 163                          | 3,235     | 116      | 9,414      | 0.58        | 0.05        | 0.74        | 0.09        | 0.11        |
| 0.1                     | 1,872,420       | 894        | 193,538      | 23.8                                | 15.9                                  | 61.9                                          | 16901.7                                         | 120                          | 453       | 68       | 5,362      | 0.64        | 0.21        | 0.91        | 0.32        | 0.33        |
| 0.2                     | 548,679         | 759        | 95,934       | 15.7                                | 13.2                                  | 57.0                                          | 8372.6                                          | 96                           | 170       | 36       | 2,328      | 0.73        | 0.36        | 0.92        | 0.48        | 0.48        |
| 0.3                     | 143,332         | 590        | 36,887       | 10.5                                | 9.9                                   | 46.1                                          | 3214.5                                          | 87                           | 82        | 10       | 1,127      | 0.90        | 0.51        | 0.93        | 0.65        | 0.65        |
| 0.4                     | 36,112          | 299        | 13,408       | 6.5                                 | 7.8                                   | 22.1                                          | 1164.2                                          | 80                           | 54        | 4        | 787        | 0.95        | 0.60        | 0.94        | 0.73        | 0.73        |
| <b>*0.5</b>             | <b>27,032</b>   | <b>250</b> | <b>8,165</b> | <b>4.8</b>                          | <b>6.4</b>                            | <b>19.2</b>                                   | <b>707.3</b>                                    | <b>72</b>                    | <b>37</b> | <b>2</b> | <b>622</b> | <b>0.97</b> | <b>0.66</b> | <b>0.95</b> | <b>0.79</b> | <b>0.78</b> |
| 0.6                     | 21,592          | 197        | 4,752        | 3.1                                 | 4.5                                   | 15.8                                          | 410.8                                           | 65                           | 22        | 1        | 457        | 0.98        | 0.75        | 0.96        | 0.85        | 0.84        |
| 0.7                     | 17,207          | 115        | 2,476        | 2.2                                 | 3.2                                   | 8.8                                           | 213.2                                           | 55                           | 9         | 0        | 215        | 1.00        | 0.86        | 0.97        | 0.92        | 0.91        |
| 0.8                     | 6,846           | 93         | 1,155        | 1.3                                 | 1.8                                   | 7.6                                           | 99.1                                            | 36                           | 3         | 0        | 81         | 1.00        | 0.92        | 0.98        | 0.96        | 0.94        |
| 0.9                     | 2,783           | 70         | 372          | 1.2                                 | 1.0                                   | 5.6                                           | 31.5                                            | 21                           | 1         | 0        | 38         | 1.00        | 0.95        | 0.98        | 0.98        | 0.96        |
| 1                       | 174             | 54         | 119          | 0.8                                 | 0.0                                   | 4.4                                           | 10.4                                            | 0                            | 0         | 0        | 0          | -           | -           | -           | -           | -           |

302 \*The selected threshold and its results are shown in bold font.

303

## 304 2.2 Domain pair to compound mappings

305 Here, our aim was to observe if it would be possible to identify the cases where the  
 306 presence of a single domain is not sufficient for the occurrence of the interaction with the  
 307 intended compound, instead, an interface composed of multiple domains are required. Other  
 308 possible explanations for the requirement of multiple domains would be the allosteric  
 309 binding/regulation phenomenon [32], or just a complex functional relation. To analyze this

310 process, we generated compound – domain pair mappings using the procedure explained at  
311 the end of Methods section 4.2.1. For this procedure, we used the "bag of domains"  
312 approach where the order of the domains on the protein sequence was not taken into  
313 account and all possible pair combinations were then generated and tested. The reason for  
314 this evaluation is that domains that are quite far away from each other on the linear protein  
315 sequence can be located very close to each other upon folding of the protein.

316 Following the procedure described in the Methods section 4.2.1 and the thresholding/filtering  
317 of mappings with the selected parameter values described in the Results section 2.1, 3,721  
318 mappings were obtained between 1,456 compounds and 270 domain pairs. Next, these  
319 pairs were compared with single domain pairings of the same compounds, in terms of the  
320 mapping performance scores (e.g.,  $C_1 - D_x D_y$  is compared to  $C_1 - D_x$  and  $C_1 - D_y$  where  $C_1$   
321 represents a compound and  $D_x D_y$  represents a domain pair composed of the domains:  $D_x$   
322 and  $D_y$ ), to observe if there is any performance improvement by mapping a pair instead of a  
323 single domain (which is expected to provide more specific/defined interaction properties). In  
324 most of the cases, the performance of the domain pair mapping was the same as the  
325 mapping of the same compound to one of the single domains presented in the  
326 corresponding domain pair, which indicates that only a single domain is sufficient for the  
327 binding, and the other domain in the domain pair is just an extra (i.e., the second domain  
328 does not play a detectable role in the binding). We called these domain pair mappings  
329 "neutral domain pair associations". However, there were a few cases that domain pair  
330 mapping actually increased the association performance, namely "positive domain pair  
331 associations". To prepare the finalized compound – domain pair mapping set, all of the  
332 neutral associations were discarded, yielding only 22 positive associations between 10  
333 compounds and 12 domain pairs. Below, we investigated one example from positive domain  
334 pair associations as a case study. The experimental bioactivity results of the case study  
335 were obtained from the ChEMBL database (document link:  
336 [https://www.ebi.ac.uk/chembl/document\\_report\\_card/CHEMBL3621091](https://www.ebi.ac.uk/chembl/document_report_card/CHEMBL3621091)), which was

337 previously curated from the study by England *et al.* where the authors investigated potent  
338 inhibitors for KDM protein subfamilies [33].

339 The compound with the ChEMBL id "CHEMBL3621867" (link:  
340 [https://www.ebi.ac.uk/chembl/compound\\_report\\_card/CHEMBL3621867](https://www.ebi.ac.uk/chembl/compound_report_card/CHEMBL3621867)) was mapped to a  
341 single InterPro domain record named: "JmjN domain" (id: IPR003349, description: domains  
342 frequently found in the jumonji family of transcription factors, link:  
343 <https://www.ebi.ac.uk/interpro/entry/IPR003349>) with the confusion matrix values TP:3,  
344 FN:0, FP:1 and TN:2 (recall:1.00, precision:0.75, accuracy:0.83, F1-core:0.86, and  
345 MCC:0.71), the false positive hit indicates that there is one protein that contains IPR003349  
346 (gene: KDM4E, protein: "Lysine-specific demethylase 4E" in human, UniProt protein  
347 accession: B2RXH2, link: <https://www.uniprot.org/uniprot/B2RXH2>), which was recorded to  
348 be inactive against CHEMBL3621867 in ChEMBL database with a bioactivity value of  $IC_{50} =$   
349  $79.4 \mu\text{M}$  (and thus reported as a false positive in our analysis since the above mentioned  
350 single domain mapping predicted B2RXH2 as a target of CHEMBL3621867). Similarly, the  
351 same compound (CHEMBL3621867) was mapped to another single InterPro domain record  
352 named: "Zinc finger, PHD-type" (id: IPR001965, description: a C4HC3 zinc-finger-like motif  
353 found in nuclear proteins thought to be involved in chromatin-mediated transcriptional  
354 regulation, link: <https://www.ebi.ac.uk/interpro/entry/IPR001965>) with values TP:3, FN:0,  
355 FP:1 and TN:2 (recall:1.00, precision:0.75, accuracy:0.83, F1-core:0.86 and MCC:0.71),  
356 indicating that, again, there is one protein that contains IPR001965 (gene: KDM2A, protein:  
357 "Lysine-specific demethylase 2A" in human, UniProt protein accession: Q9Y2K7, link:  
358 <https://www.uniprot.org/uniprot/Q9Y2K7>), which was recorded to be inactive against  
359 CHEMBL3621867 in ChEMBL database with a bioactivity value of  $IC_{50} = 50.1 \mu\text{M}$  (and thus  
360 reported as a false positive in our analysis since the above mentioned single domain  
361 mapping would predict Q9Y2K7 as a target of CHEMBL3621867). However, the mapping  
362 between CHEMBL3621867 and the domain pair IPR003349-IPR001965 yielded an excellent  
363 mapping performance with metrics TP:3, FN:0, FP:0 and TN:3 (recall:1.00, precision:1.00,

364 accuracy: 1.00, F1-core: 1.00 and MCC: 1.00), by eliminating the false positive target  
365 predictions of B2RXH2 and Q9Y2K7 for ChEMBL3621867. The domain pair IPR003349-  
366 IPR001965 is presented in 3 reviewed human protein entries among 6 proteins with  
367 measured activities against ChEMBL3621867 (i.e., Lysine-specific demethylases 4C, 5C  
368 and 4A, genes: KDM4C, KDM5C, and KDM4A, UniProt protein accessions: Q9H3R0,  
369 P41229, and O75164), all of which were targets of the corresponding compound verified in  
370 their respective binding assays with bioactivities of  $IC_{50} = 7.9, 6.3$  and  $5.0 \mu M$ , respectively.  
371 The protein that was accurately predicted as inactive by both single domain and domain pair  
372 mappings (i.e., as a true negative) was "Lysine-specific demethylase 6B" (gene: KDM6B,  
373 UniProt protein accession: O15054), which neither possessed IPR003349 nor IPR001965.  
374 This target also received a bioactivity measurement of  $IC_{50} = 63.1 \mu M$  against  
375 ChEMBL3621867. IPR003349 domain is annotated to 10 reviewed human protein entries in  
376 the UniProtKB/Swiss-Prot database, also, IPR001965 domain is annotated to 88 reviewed  
377 human protein entries. Whereas together, IPR003349-IPR001965 domains are annotated to  
378 7 reviewed human protein entries. Due to sequence differences between KDM subfamily  
379 proteins (i.e., only 6 identical positions and 39 similar positions out of more than 1500  
380 positions in the multiple sequence alignment of 6 KDM subfamily proteins), their domain  
381 annotations are different from each other, which is possibly reflected in their 3-D structure  
382 (although it is not possible to be sure without a crystal structure), and thus, the interaction  
383 with the corresponding compound (i.e., ChEMBL3621867).

384 It is important to note that, proteins annotated with only one of the domains listed above (i.e.,  
385 IPR003349 or IPR001965) are also targeted by ChEMBL3621867; however, corresponding  
386  $IC_{50}$ s are way beyond plausible bioactivity values accepted for potential drug candidates  
387 (i.e.,  $< 10 \mu M$ ). On the other hand, the presence of both domains on the target protein  
388 yielded  $IC_{50}$  values that are within the acceptable range. This predicted domain pair –  
389 compound mapping (or any association predicted by DRUIDom) does not directly state a  
390 true physical binding between the mapped domains and the compound, it only suggests a



391 relationship between the two entities (i.e., either physical or a functional interaction), where  
392 the interaction is stronger in the cases with the presence of both domains. Thus, targeting  
393 KDM subfamily proteins containing both IPR003349 and IPR001965 with CHEMBL3621867  
394 would have a higher chance of success in a drug discovery study.

395 It is probable for Q9Y2K7 (KDM2A) protein to partially possess the IPR003349 domain at  
396 the N-terminal side. If this is the case, the InterProScan tool might not report the hit due to  
397 obtaining a low score under the default statistical cut-off value. To analyze the case, we  
398 locally aligned (using Smith-Waterman with default parameters of gap open: 10, gap extend:  
399 0.5, and scoring matrix: BLOSUM62) the first 100 N-terminal residues of Q9Y2K7 (KDM2A)  
400 and O75164 (KDM4A), which is reported to possess IPR003349 between the positions 13  
401 and 56 according to InterPro (<https://www.ebi.ac.uk/interpro/protein/UniProt/O75164/>). The  
402 output alignment reported a statistically significant hit (with 53.6% similarity between two  
403 sequences along the alignment length of 28 residues) between KDM4A sequence positions  
404 11 and 38, which roughly spans the half of the IPR003349 domain, indicating the partial  
405 existence of the domain on Q9Y2K7 (KDM2A). Nevertheless, the partial existence of the  
406 domain may be the reason behind observing interaction with a rather high bioactivity value  
407 (i.e.,  $IC_{50} = 50.1 \mu M$ ). It is not possible for us to further comment on the physical binding as  
408 there is no co-crystal structure of a KDM subfamily protein with CHEMBL3621867.

409 Besides single domains and domain pairs, it is also possible for some of the compound –  
410 target interactions to require (either physically or functionally) three or even more domains to  
411 be presented at the target protein. We could not account for these cases in DRUIDom since  
412 they dramatically increase the complexity of the analysis, as a result, we chose to omit the  
413 cases with more than 2 domains.

### 414 **2.3 Predicting New Drug/Compound – Target Protein Interactions**

415 Drug/compound – target protein interaction predictions were generated by propagating the  
416 drug/compound – single domain (or domain pair) mappings to proteins and other

417 compounds, using the procedure explained in Methods section 4.2.2. The crossing of new  
418 compounds and targets for each mapping has led to a geometric increase in the number of  
419 associations/predictions. Finally, a simple post-processing filter was applied to predictions  
420 for removing the known/recorded compound – target protein interactions from the prediction  
421 set.

422 First, 3,672,076 novel interactions (between 8,158 compounds and 5,563 proteins) were  
423 generated with the propagation of single domains to proteins (i.e., 250 domains to 5,563  
424 proteins). Also, 631 novel interactions (between 9 compounds and 286 proteins) were  
425 produced with the propagation of domain pairs to proteins (i.e., 12 domain pairs to 286  
426 proteins). The low number of predictions with domain pairs was due to the elimination of the  
427 domain pair mappings that did not display a performance increase over the single domain  
428 mappings of the same compound. At this point, the merged prediction dataset contained  
429 3,672,220 novel interactions between 8,163 compounds and 5,563 proteins, after the  
430 removal of duplicates. The finalized prediction dataset was obtained following the  
431 propagation of the compounds in the previous prediction set to significantly similar  
432 compounds according to molecular similarity-based compound clusters, which yielded  
433 5,050,841 novel interactions between 10,944 compounds and 5,461 proteins in the finalized  
434 prediction dataset, following the removal of known interactions. One notable observation is  
435 that there was only a slight increase in the number of compounds (from 8,163 to 10,944)  
436 after the pairwise molecular similarity-based propagation, which can be explained by the  
437 strict Tanimoto threshold of 0.8, which only passes the most reliable predictions.

#### 438 **2.4 Validation of Predicted Molecular Interactions**

439 To select inhibitory compound predictions for *in silico* and *in vitro* experimental validation, we  
440 first checked our large-scale drug/compound – target interaction prediction dataset and  
441 found 116 inhibitor predictions for PI3K/AKT/mTOR signalling pathway proteins (Table 2),  
442 mainly due to the critical role of this pathway in various types of cancer [26]. Out of these, 4  
443 compounds have been predicted as inhibitors of both LIMK1 and LIMK2 proteins

444 (serine/threonine-protein kinases taking important roles in metastasis by phosphorylating  
445 cofilin proteins [27]). Structures of these compounds are given in Figure 2 together with their  
446 ChEMBL database identifier and short names as used in this study. These compounds are  
447 associated with LIMKs over their “Serine-threonine/tyrosine-protein kinase, catalytic domain”  
448 (InterPro domain id: IPR001245). In addition, we designed, synthesized, and tested 4 novel  
449 derivatives of the most active compound LIMKi-2 (Figure 2, compounds LIMKi-2a-d).

450 **Table 2.** Inhibiting compound predictions for PI3K/AKT/mTOR pathway proteins: MDM2,  
451 VEGFA, LIMK1 and LIMK2; given as ChEMBL molecule identifiers and gene names of the  
452 corresponding targets.

| Predicted Compound (ChEMBL id) | Target Protein (Gene Name) | Predicted Compound (ChEMBL id) | Target Protein (Gene Name) |
|--------------------------------|----------------------------|--------------------------------|----------------------------|
| CHEMBL1316589                  | LIMK1                      | CHEMBL505899                   | MDM2                       |
| CHEMBL1512352                  | LIMK1                      | CHEMBL506261                   | MDM2                       |
| CHEMBL516650                   | LIMK1                      | CHEMBL506263                   | MDM2                       |
| CHEMBL518653                   | LIMK1                      | CHEMBL506507                   | MDM2                       |
| CHEMBL1316589                  | LIMK2                      | CHEMBL506623                   | MDM2                       |
| CHEMBL1512352                  | LIMK2                      | CHEMBL506646                   | MDM2                       |
| CHEMBL516650                   | LIMK2                      | CHEMBL506647                   | MDM2                       |
| CHEMBL518653                   | LIMK2                      | CHEMBL506740                   | MDM2                       |
| CHEMBL1241424                  | MDM2                       | CHEMBL507004                   | MDM2                       |
| CHEMBL1241425                  | MDM2                       | CHEMBL507649                   | MDM2                       |
| CHEMBL1241426                  | MDM2                       | CHEMBL508126                   | MDM2                       |
| CHEMBL1243385                  | MDM2                       | CHEMBL508377                   | MDM2                       |
| CHEMBL1242922                  | MDM2                       | CHEMBL508398                   | MDM2                       |
| CHEMBL458791                   | MDM2                       | CHEMBL508486                   | MDM2                       |
| CHEMBL514738                   | MDM2                       | CHEMBL508491                   | MDM2                       |
| CHEMBL515347                   | MDM2                       | CHEMBL508564                   | MDM2                       |
| CHEMBL515848                   | MDM2                       | CHEMBL508902                   | MDM2                       |
| CHEMBL516172                   | MDM2                       | CHEMBL508983                   | MDM2                       |
| CHEMBL475670                   | MDM2                       | CHEMBL509409                   | MDM2                       |
| CHEMBL481213                   | MDM2                       | CHEMBL509666                   | MDM2                       |
| CHEMBL481421                   | MDM2                       | CHEMBL510017                   | MDM2                       |
| CHEMBL1791379                  | MDM2                       | CHEMBL510066                   | MDM2                       |
| CHEMBL1791380                  | MDM2                       | CHEMBL510233                   | MDM2                       |
| CHEMBL1791382                  | MDM2                       | CHEMBL510473                   | MDM2                       |
| CHEMBL219860                   | MDM2                       | CHEMBL510817                   | MDM2                       |
| CHEMBL434556                   | MDM2                       | CHEMBL511030                   | MDM2                       |
| CHEMBL427239                   | MDM2                       | CHEMBL524509                   | MDM2                       |

|               |      |               |      |
|---------------|------|---------------|------|
| CHEMBL1791381 | MDM2 | CHEMBL524659  | MDM2 |
| CHEMBL445253  | MDM2 | CHEMBL524691  | MDM2 |
| CHEMBL505051  | MDM2 | CHEMBL524856  | MDM2 |
| CHEMBL503520  | MDM2 | CHEMBL524887  | MDM2 |
| CHEMBL207341  | MDM2 | CHEMBL524908  | MDM2 |
| CHEMBL443697  | MDM2 | CHEMBL525014  | MDM2 |
| CHEMBL446284  | MDM2 | CHEMBL525018  | MDM2 |
| CHEMBL450322  | MDM2 | CHEMBL525040  | MDM2 |
| CHEMBL451424  | MDM2 | CHEMBL525045  | MDM2 |
| CHEMBL451944  | MDM2 | CHEMBL525060  | MDM2 |
| CHEMBL454229  | MDM2 | CHEMBL525201  | MDM2 |
| CHEMBL486090  | MDM2 | CHEMBL525263  | MDM2 |
| CHEMBL499121  | MDM2 | CHEMBL525265  | MDM2 |
| CHEMBL499749  | MDM2 | CHEMBL525594  | MDM2 |
| CHEMBL499766  | MDM2 | CHEMBL525614  | MDM2 |
| CHEMBL500441  | MDM2 | CHEMBL525624  | MDM2 |
| CHEMBL500788  | MDM2 | CHEMBL525635  | MDM2 |
| CHEMBL501541  | MDM2 | CHEMBL525636  | MDM2 |
| CHEMBL503191  | MDM2 | CHEMBL526187  | MDM2 |
| CHEMBL503489  | MDM2 | CHEMBL526336  | MDM2 |
| CHEMBL503730  | MDM2 | CHEMBL526337  | MDM2 |
| CHEMBL503983  | MDM2 | CHEMBL526381  | MDM2 |
| CHEMBL504226  | MDM2 | CHEMBL526861  | MDM2 |
| CHEMBL504266  | MDM2 | CHEMBL527080  | MDM2 |
| CHEMBL504423  | MDM2 | CHEMBL527084  | MDM2 |
| CHEMBL504493  | MDM2 | CHEMBL1089944 | VEGF |
| CHEMBL504855  | MDM2 | CHEMBL1689394 | VEGF |
| CHEMBL504919  | MDM2 | CHEMBL499790  | VEGF |
| CHEMBL505501  | MDM2 | CHEMBL501558  | VEGF |
| CHEMBL505622  | MDM2 | CHEMBL508411  | VEGF |
| CHEMBL505790  | MDM2 | CHEMBL509774  | VEGF |

453

454 **Figure 2.** Structures, database identifiers, and 2-D representations of predicted LIMK  
455 inhibitory compounds (LIMKi-1, 1a, 2, and 3) and derivatives (LIMKi-2a, b, c, and d).

#### 456 2.4.1 Molecular Docking of Novel LIMK Inhibitors

457 For *in silico* validation of computationally predicted LIMK inhibitors, molecular docking  
458 analyses were conducted. LIMK proteins (LIMK1 and LIMK2) are serine/threonine kinases  
459 with multidomain structures including 2 LIM zinc-binding domains, 1 PDZ domain and 1  
460 protein kinase domain. Multi-kinase inhibitor staurosporine and previously described LIMK

461 inhibitor 9D8 have published crystal structures with the kinase domains of LIMK1 and LIMK2  
462 proteins. These molecules were used as reference for docking to compare their binding free  
463 energies ( $\Delta G$ ) with the computationally predicted and novel LIMK inhibitors. In addition to  
464 computationally predicted compounds (i.e., LIMKi-1, LIMKi-1a, LIMKi-2 and LIMKi-3), novel  
465 derivatives of LIMKi-2 (i.e., LIMKi-2a, LIMKi-2b, LIMKi-2c and LIMKi-2d) were also docked  
466 against kinase domains of LIMK1 and LIMK2 proteins. AutoDock grid box parameters used  
467 in these analyses are displayed in Table 3a, and the docking results of each LIMK protein –  
468 compound combination are shown in Table 3b, which displays the lowest binding free  
469 energy calculation at the best pose obtained either from rigid or flexible docking in  
470 AutoDock. All files and results of the docking analysis, including the ones for online  
471 MTiAutoDock and SwissDock docking runs, are available in the data repository of this study.  
472 Based on the results in Table 3b; LIMKi-2, LIMKi-2d, and LIMKi-3 have binding free energy  
473 values close to that of the reference ligand staurosporine (“staurosporine”  $\Delta G = -10.55$   
474 kcal/mol,  $K_i = 18.47$  nM; “9D8”  $\Delta G = -12.38$  kcal/mol,  $K_i = 0.837$  nM) for the LIMK1 protein,  
475 where the lower values indicate stronger interactions. As for the LIMK2 protein, binding free  
476 energy values for all ligands, except LIMKi-1 and LIMKi-1a, were around the generally  
477 accepted thresholds to assume a potential activity (i.e., -10 to -12 kcal/mol), which were  
478 close to the value of reference ligand 9D8 (i.e., -12.38 kcal/mol). In Figure 3, the best poses  
479 of LIMKi-2 and LIMKi-3 dockings against kinase domain binding sites of LIMK proteins are  
480 visualized along with the docking of reference molecules. The results indicate  
481 computationally predicted LIMK inhibitors, especially LIMKi-2 (including its derivatives) and  
482 LIMKi-3, could be promising candidate molecules for targeting LIM kinases.

483 **Table 3. (a)** Grid box parameters for AutoDock in the molecular docking analysis; **(b)**  
484 molecular docking results of computationally predicted LIMK inhibitors and their derivatives  
485 against kinase domains of LIMK proteins in terms of binding free energy ( $\Delta G$ ) and inhibition  
486 constant ( $K_i$ ) estimations at the best pose.

487

488 (a)

|                               | # of points in x-y-z dimension | Spacing (angstrom) | x, y, z centers         |
|-------------------------------|--------------------------------|--------------------|-------------------------|
| <b>LIMK1 rigid docking</b>    | 60-60-40                       | 0.375              | 14.878, 6.646, 34.402   |
| <b>LIMK1 flexible docking</b> | 80-80-60                       | 0.375              | 14.878, 6.646, 34.402   |
| <b>LIMK2 rigid docking</b>    | 60-60-40                       | 0.375              | 25.016, -13.952, 17.984 |
| <b>LIMK2 flexible docking</b> | 80-80-60                       | 0.375              | 25.016, -13.952, 17.984 |

489 (b)

|                        | $\Delta G$ (kcal/mol) |        | $K_i$ (nM) |        |
|------------------------|-----------------------|--------|------------|--------|
|                        | LIMK1                 | LIMK2  | LIMK1      | LIMK2  |
| <b>Native ligands*</b> | -10.55                | -12.38 | 18.47      | 0.837  |
| <b>LIMKi-1</b>         | -7.68                 | -9.9   | 2340       | 55.14  |
| <b>LIMKi-1a</b>        | -7.47                 | -9.34  | 3330       | 142.42 |
| <b>LIMKi-2</b>         | -10.11                | -12.07 | 38.73      | 1.43   |
| <b>LIMKi-2a</b>        | -9.74                 | -11.32 | 72.38      | 5.01   |
| <b>LIMKi-2b</b>        | -9.13                 | -11.01 | 203.95     | 8.52   |
| <b>LIMKi-2c</b>        | -9.67                 | -11.92 | 82.22      | 1.83   |
| <b>LIMKi-2d</b>        | -10.28                | -12    | 28.94      | 1.61   |
| <b>LIMKi-3</b>         | -10.03                | -11.92 | 44.34      | 1.82   |

490 \*Native ligands correspond to small molecule compounds staurosporine and 9D8 for LIMK1 and  
491 LIMK2, respectively.

492 **Figure 3.** Visualization of the docked complex structures of (a) LIMK1 kinase domain in  
493 complex with the reference molecule staurosporine (green), LIMKi-2 (violet), and LIMKi-3  
494 (red), and (b) LIMK2 kinase domain in complex with the reference molecule 9D8 (dark  
495 cyan), LIMKi-2 (violet), and LIMKi-3 (red) at the best poses. Hydrogen bonds are displayed  
496 with dark blue lines. Gold and pink colors represent LIMK1 and LIMK2 protein residues  
497 interacting with the corresponding compounds.

498 2.4.2 In vitro Experimental Analysis of LIMK Inhibition

499 *LIMKi Compounds have inhibitory effects on human cancer cells*

500 To address whether predicted inhibitors have cytotoxic effects on transformed normal  
 501 human (HEK-238) and various epithelial cancer cell lines (e.g., MCF-7, HCT116, Huh7, and  
 502 Mahlavu), cells were treated with LIMKi compounds with a concentration gradient of 40  $\mu$ M  
 503 to 2.5  $\mu$ M for 72 hours. The resulting cytotoxic IC<sub>50</sub> values are given in Table 4a. While there  
 504 is no cytotoxicity observed on normal cells, LIMKi-2 and LIMKi-3 compounds display  
 505 cytotoxic activities between 5.5-17.3  $\mu$ M on cancer cells. Since LIMKi-2 showed the most  
 506 potential bioactivity, we synthesized four novel derivatives of LIMKi-2 and assessed their  
 507 bioactivities on Huh7 and Mahlavu liver cancer cells. LIMKi-2 derivatives; 2c, 2d displayed  
 508 cytotoxic activities on Huh7 and Mahlavu cells ( $\sim$ 8 $\mu$ M and  $<$ 20 $\mu$ M, respectively), while  
 509 LIMKi-2a had no effect (Table 4b).

510 **Table 4.** Cytotoxic bioactivities of LIMKi molecules on human cells: (a) LIMKi-1,3  
 511 compounds (b) LIMKi-2 derivatives.

512 (a)

| LIMKi molecules                                               | IC <sub>50</sub> Values ( $\mu$ M) |          |                |                |
|---------------------------------------------------------------|------------------------------------|----------|----------------|----------------|
|                                                               | LIMKi-1                            | LIMKi-1a | LIMKi-2        | LIMKi-3        |
| HEK-293 (Transformed Normal Human Embryonic Kidney Cell Line) | NI                                 | NI       | NI             | NI             |
| MCF-7 (Breast Cancer Cell Line)                               | NI                                 | NI       | 6.4 $\pm$ 1.0  | 5.5 $\pm$ 0.3  |
| HCT116 (Colon Cancer Cell Line)                               | NI                                 | NI       | 5.6 $\pm$ 1.3  | 6.8 $\pm$ 1.2  |
| Huh7 (Liver Cancer Cell Line)                                 | NI                                 | NI       | 7.9 $\pm$ 0.7  | 9.4 $\pm$ 1.2  |
| Mahlavu (Liver Cancer Cell Line)                              | NI                                 | NI       | 13.8 $\pm$ 0.8 | 17.7 $\pm$ 0.3 |

513 (b)

| LIMKi-2 derivatives | IC <sub>50</sub> Values ( $\mu$ M) |
|---------------------|------------------------------------|
|                     |                                    |



|                                  | LIMKi-2a | LIMKi-2b   | LIMKi-2c   | LIMKi-2d   |
|----------------------------------|----------|------------|------------|------------|
| Huh7 (Liver Cancer Cell Line)    | NI       | 28.4 ± 2.5 | 8.2 ± 1.4  | 7.06 ± 0.8 |
| Mahlavu (Liver Cancer Cell Line) | NI       | 24.6 ± 1.0 | 15.9 ± 3.1 | 15.3 ± 1.3 |

514

515 As stated above, phosphorylated LIMK proteins are involved in actin cytoskeleton dynamics  
516 through cofilin phosphorylation, hence we performed experiments on the migration and  
517 invasion properties of liver cancer cells in the presence of LIMK inhibitors. We focused on  
518 Huh7 and Mahlavu liver cancer cells for the rest of the study, because primary liver cancer  
519 (hepatocellular cancer, HCC) usually presents with multiple tumors within the liver and  
520 intrahepatic metastatic spread is a major problem for this cancer [34].

521 *LIMKi compounds are effective in vitro by reducing the level of cofilin phosphorylation*

522 Cofilin is a downstream molecule and its function is regulated by LIMK. Hence, we assessed  
523 phospho-Cofilin protein levels in Huh7 and Mahlavu cells in the presence of LIMK inhibitors.  
524 Phosphorylation of cofilin by LIMKs is significantly reduced upon treatment with LIMK  
525 inhibitors in both Huh7 and Mahlavu cells except for LIMKi-1 and LIMKi-2d, respectively  
526 (Figure 4a, b). Mahlavu cells are reported to have a resistant phenotype due to PTEN tumor-  
527 suppressive protein deficiency for migration [35]. Therefore, the differential response against  
528 LIMK inhibitors by well-differentiated Huh7 cells and poorly differentiated drug-resistant  
529 Mahlavu cells are as expected and allows us to better assess the dose-response of LIMK  
530 inhibitors.

531 The ratio of phosphorylated to non-phosphorylated Cofilin protein levels, together with LIMK  
532 protein phosphorylation was previously reported as an indication of the metastatic potential  
533 of a cell [27]. Therefore, we also checked the ratio of phospho- to total Cofilin levels for both  
534 Huh7 and Mahlavu cells (Figure 4a, b) and found that LIMK inhibitors decreased the  
535 phospho-Cofilin ratio significantly. These results may lead to the discovery of novel  
536 therapeutic agents against the metastatic capacity of hepatocellular carcinoma cancer cells.

537 **Figure 4.** Phospho-Cofilin protein expression. **(a)** Huh7 and **(b)** Mahlavu cells were cultured  
538 with LIMK inhibitors (20  $\mu$ M) for 48 hours and expression of active p-Cofilin and total Cofilin  
539 levels were assessed with western blot analysis. The bar graph indicates the relative  
540 intensity of p-Cofilin levels compared to untreated DMSO controls. The equal loading control  
541 was analyzed based on the total protein staining normalization protocol. The ratio of  
542 phospho- and total Cofilin levels for both Mahlavu and Huh7 cell lines were calculated.

543 *LIMK inhibitors significantly reduce migration and invasion of HCC cells in vitro*

544 LIMK/Cofilin/ADF cascade has been described as one of the major regulators for actin  
545 cytoskeleton dynamics and reorganization [36]. Bioactivities of LIMKi compounds were  
546 tested for their effects on the migration and invasion capacity of HCC cell lines by wound  
547 healing and real-time cell invasion Transwell assays, respectively. First, Huh7 cell migration  
548 was analyzed in the presence of predicted LIMK inhibitors 1, 1a, 2, and 3. Huh7 cells have  
549 less migration capability compared to Mahlavu cells, so Huh7 migration was only tested with  
550 the originally predicted molecules. LIMKi-2 and LIMKi-3 strongly reduced the migration (2%  
551 gap closure) of Huh7 cells when compared to DMSO controls (48% gap closure) within 10  
552 hours (Figure 5a). Then LIMKi-1, LIMKi-1a, LIMKi-2, LIMKi-3 and LIMKi-2 derivatives were  
553 tested on the migration of Mahlavu cells. LIMKi-2 derivatives reduced the resistant Mahlavu  
554 cell migration by 2.6-3.7 folds when compared to DMSO controls (Figure 5b).

555 We also tested the bioactivities of predicted compounds and their derivatives by real-time  
556 cell invasion for 48 hours on Huh7 and Mahlavu cells. Figure 6 indicates that LIMKi-2d was  
557 the most significant compound in terms of reducing the invasion capacity of both Mahlavu  
558 and Huh7 cell lines after 12 hours of treatment and throughout 48 hours. LIMKi-2c also  
559 significantly reduced Huh7 cell invasion.

560 **Figure 5:** Wound healing assay. *In vitro* “wound” was created by a straight-line scratch  
561 across the monolayer **(a)** Huh7, **(b)** Mahlavu cells. Then cells were treated with indicated  
562 concentrations of LIMKi compounds for 10 hours and % wound gap closures were

563 calculated. Bar graphs represent percent-based wound healing for Huh7 and Mahlavu cell  
564 lines.

565 **Figure 6:** Cell invasion assay. Average cell index values are normalized according to  
566 DMSO, which is represented by the horizontal dashed line for; **(a)** Huh7, and **(b)** Mahlavu  
567 cell lines, in the presence of LIMK inhibitors. The serum-free media containing 20  $\mu$ M of  
568 each LIMKi compound were used and invasion progress of cells was monitored via  
569 xCelligence DP RTCA System (\*: p-value < 0.05, \*\*\*\*: p-value < 0.0001).

570

### 571 **3. Discussion**

572 In this study, the main objective was to develop a computational method for predicting drug  
573 (or drug candidate compound) – target protein interactions with high confidence, for the  
574 purposes of improved drug discovery and repurposing. Here, we aimed to cover both  
575 physical and functional relationships between small molecule ligands and target proteins, to  
576 account for bio-interactions at higher levels, such as the inhibition of a cell with a drug/drug  
577 candidate compound. In DRUIDom, we assumed a data-driven approach and used  
578 experimentally validated interactions at large scale to build and optimize our model. For this,  
579 we utilized ChEMBL and PubChem databases and carefully filtered the bioactivity data  
580 points to construct our source dataset of compound – target protein interactions, which is  
581 one of the largest curated, high-quality experimental bioactivity datasets ever built, as far as  
582 we are aware (composed of 2,869,943 interaction data points between 3,644 target proteins  
583 and 1,033,581 compounds). This dataset is available in the data repository of the study and  
584 can be used by researchers working in the fields of drug discovery and repurposing, both as  
585 a training and benchmark dataset for the construction of new computational predictive  
586 models.

587 The idea behind DRUIDom's methodology is to identify the protein domains that are required  
588 for the interaction to occur (either physically or functionally), and propagating these  
589 associations to proteins that possess those domains. Thus, it was critical to successfully  
590 separate mappings that indicate a true relationship from the ones observed by chance. For  
591 this, we incorporated known/verified compound – target protein relations with undesired  
592 bioactivity levels (i.e., high  $xC_{50}$  values:  $> 20 \mu\text{M}$ ) as "inactives" even though they also are  
593 interactors, along with "actives" (compound – target protein pairs with the desired levels of  
594 bioactivity:  $xC_{50} < 10 \mu\text{M}$ ), as two different datasets. This approach enabled us to score  
595 compound – domain mappings in terms of potential true-false positives and true-false  
596 negatives (as explained in the Methods section 4.2.1), and to identify pairs with a practical  
597 potential to ultimately become new treatment options.

598 One limitation of our data-centric methodological approach is penalizing a compound –  
599 domain mapping with a false negative count if one of the known active target proteins does  
600 not contain the mapped domain. It is known that a small molecule can be the ligand of  
601 different proteins and different domains, especially when the structural features of the  
602 corresponding binding sites are similar to each other. In cases like this, penalizing a  
603 mapping leads to the underestimation of its mapping score. In order to minimize this effect,  
604 we took the InterPro domain hierarchy into account while calculating the mapping scores.  
605 InterPro combines domains from the same functional family under distinct hierarchical trees.  
606 There are also significant similarities between the sequence profiles of domains from the  
607 same hierarchy. In DRUIDom, while scoring a mapping, we checked whether the known  
608 active and inactive target proteins of the intended compound possess domains from the  
609 same hierarchy. As such, we counted an active target protein containing a domain from the  
610 same hierarchy (but not the actual mapped domain) as a true positive (instead of false  
611 negative) and counted an inactive target protein containing a domain from the same  
612 hierarchy as a false positive (instead of true negative). In this way, domain similarity has  
613 been incorporated in DRUIDom. However, there are also cases where a single compound

614 binds to domains from completely different hierarchies. Our approach does not currently  
615 take these cases into account.

616 During the parameter optimization and performance analyses of DRUIDom, it was important  
617 to make sure that there was no data leak from the benchmark test dataset to our training set.  
618 This condition has been automatically satisfied since the source of the mappings in the  
619 InteracDome benchmark dataset (i.e., PDB co-complex structures) and the source of the  
620 mappings in our training dataset (i.e., assay-based biological activity measurements  
621 obtained from ChEMBL and PubChem databases) are completely independent from each  
622 other.

623 In our analysis, we observed that only a small portion of the InterPro domain entries appear  
624 in the finalized compound – domain mappings, with the total number of 250 domains, as  
625 opposed to 8,165 compounds, at the selected mapping score threshold. The main reason  
626 behind this observation may lie in the data distribution in the source bioactivity dataset, as  
627 members from the same protein families have been targeted in most of the experimental  
628 bioassays (e.g., kinases, GPCRs). The distribution of the number of compounds mapped to  
629 each domain reveals that the top 10 domains constitute 56.7% of 27,032 mappings in total  
630 (i.e. “IPR000719 - Protein kinase domain”, “IPR001245 - Serine-threonine/tyrosine-protein  
631 kinase, catalytic domain”, “IPR017452 - GPCR, rhodopsin-like, 7TM”, “IPR020635 -  
632 Tyrosine-protein kinase, catalytic domain”, “IPR028174 - Fibroblast growth factor receptor 1,  
633 catalytic domain”, “IPR030611 - Aurora kinase A”, “IPR034670 - Checkpoint kinase 1,  
634 catalytic domain”, “IPR035588 - Janus kinase 2, pseudokinase domain”, “IPR035589 -  
635 Janus kinase 2, catalytic domain”, “IPR039192 - Glycogen synthase kinase 3, catalytic  
636 domain”). Overall, eight out of ten of these domains belong to kinases.

637 We examined the difference in target proteins between our source bioactivity dataset and  
638 the resulting predicted DTIs dataset, to observe if it was possible to produce predictions for  
639 under-studied proteins through the approach outlined in this study. The unique number of  
640 target proteins in our source bioactivity dataset is 3,644, whereas, this number is 5,563 for

641 our finalized DTI prediction dataset, which indicates that there is a 52.7% increase in target  
642 proteins thanks to the domain-based association approach. We also checked the protein  
643 family distribution of the targets in the original and the predicted interaction datasets,  
644 considering 5 main classes of proteins as enzymes, membrane receptors, ion channels,  
645 transcription factors, and others (i.e., a combination of transporters, epigenetic regulators,  
646 secreted proteins, other cytosolic proteins, other nuclear proteins, and other categories),  
647 according to the first level (L1) of ChEMBL protein classification  
648 (<https://www.ebi.ac.uk/chembl/g/#browse/targets>). For this, we compared the target protein  
649 family distribution in the original bioactivity dataset (i.e., 64% enzymes, 11% membrane  
650 receptors, 5% ion channels, 4% transcription factors, and 16% others) with our DTI  
651 prediction dataset (i.e., 50% enzymes, 25% membrane receptors, 7% ion channels, 8%  
652 transcription factors, and 10% others). Although dominating families in the source bioactivity  
653 dataset prevail in the predicted DTIs dataset, we were able to produce interacting compound  
654 predictions for a critically higher number of proteins from membrane receptor, ion channel,  
655 and transcription factor families with a 248%, 114%, and 238% increase, respectively. These  
656 results, again, demonstrate the effectiveness of the domain-based approach in predicting  
657 new target proteins.

658 In this study, we aimed to validate our drug/compound – target protein interaction prediction  
659 method by targeting the PI3K/Akt/mTOR pathway by focusing on the predicted LIM kinase  
660 inhibitors. The importance of selecting LIMKs as targets come from their unique kinase  
661 domains which have longer activation loops compared to many kinases, allowing the design  
662 of specific inhibitors against cancer invasion and metastasis [31]. Furthermore, LIMK1  
663 knockout was not embryonically lethal in mice making this protein a good candidate for drug  
664 design [37]. Another study showed that LIMK activity is beneficial for cancer cells in terms of  
665 coping with chemotherapeutics and ionizing radiation, which renders cells resistant to these  
666 treatments [38-41]. Therefore, LIMKs are promising candidates due to their essential role in  
667 cytoskeletal remodeling leading to cell migration and invasion. Hence, the lack of cytotoxicity

668 of our predicted compounds on normal transformed HEK-238 cells is in parallel with the  
669 above-mentioned cellular LIMK activities, which is prominent in cancer cells.

670 For the validation study, we initially examined the binding properties of 4 originally predicted  
671 compounds (i.e., LIMKi-1, 1a, 2, and 3) by computational docking and comparing with the  
672 crystal structures of multi-kinase inhibitor staurosporine and previously identified LIMK ligand  
673 9D8 in complex with LIMK1 and LIMK2 proteins, respectively. LIMKi-2, its derivatives, and  
674 LIMKi-3 had the most significant binding energies. During the *in vitro* validation stage of the  
675 study, we performed bioactivity experiments on liver cancer cells because intrahepatic  
676 metastatic migration/invasion is a major problem for patient survival and the specific  
677 selection of treatment is dependent on the number of distinct cancer nodules within the  
678 organ [42]. Our observations from the docking analysis were further supported by  
679 cytotoxicity and migration/invasion experiments where LIMKi-2 was the most significant  
680 compound regarding its action on cancer cells. Our promising results with LIMKi-2 directed  
681 us to synthesize 4 novel derivatives of this compound (i.e., LIMKi-2a, b, c, and d). Among  
682 these derivative compounds, LIMKi-2c and LIMKi-2d displayed highly significant anti-  
683 migratory and anti-invasive properties on liver cancer cells, together with strong docking  
684 binding affinities. The increased activity for LIMKi-2c and 2d is interesting and seems to  
685 point to a favorable change in conformation due to the bromide substituent that twists the  
686 benzene ring against the thiadiazol and causes loss of coplanarity. Finally, our evaluation  
687 singled out the novel LIMKi-2d compound as a promising candidate therapeutic agent due to  
688 its action on mesenchymal Mahlavu cells which are highly aggressive in terms of drug  
689 resistance for cytotoxicity, motility, and migration [43].

690 As future work, we plan to further develop our predictive approach by identifying  
691 associations between ligands and experimentally characterized protein structures (from  
692 Protein Data Bank) and high-quality structure models generated by cutting-edge structure  
693 prediction methods [44]. Additionally, we plan to develop a web-based tool that contains the  
694 entire pipeline, where researchers from various fields can both browse pre-computed



695 associations/predictions, and generate interacting drug/compound predictions for their  
696 proteins of interest on the fly, using the provided interface. We also plan to extend the work  
697 on LIMK inhibition with additional *in vitro* experiments and *in vivo* studies, with the ultimate  
698 aim of contributing to the development of new cancer drugs.

699 The computational drug/compound – target protein interaction prediction approach proposed  
700 in this study led to the identification of novel interactions, a selected subset of which were  
701 then validated by both *in silico* and *in vitro* experiments. Results of the cell-based validation  
702 experiments indicate DRUIDom has the ability to generate generalized predictions that are  
703 well-translated into higher organizational levels such as the cell. Also based on these  
704 results, it is possible to state that the approach proposed here is producing biologically  
705 relevant results that can be utilized in drug discovery and repurposing studies beyond  
706 PI3K/Akt/mTOR pathway and cancer, especially for pathological conditions where specific  
707 domain-based targeting may be critical, such as metabolic disorders.

708

## 709 **4. Methods**

### 710 **4.1 Dataset Construction**

711 Bioactivity data points, each of which indicates the experimentally verified interaction  
712 between a compound and a target biomolecule (i.e., protein), were downloaded from open-  
713 access bioassay databases and divided into 2 classes as active (i.e., interacting) and  
714 inactive (i.e., non-interacting, or more precisely: “non-interacting at the desired level”) pairs.  
715 For the selection of active data points, we used a bioactivity value threshold of  $< 10 \mu\text{M} \times \text{C}_{50}$   
716 (i.e.,  $\text{IC}_{50}$  or equivalent). For inactives, we used a bioactivity value threshold of  $> 20 \mu\text{M} \times \text{C}_{50}$ .  
717 The data points between 10 and 20  $\mu\text{M}$  were discarded, since their classification to either  
718 class was considered to be ambiguous.

719 ChEMBL bioactivity database [17] and PubChem bioassay database [16] were used as the  
720 bioactivity data source. The bioactivity data was acquired from the ChEMBL database (v23)  
721 via SQL queries with specified parameters (i.e., assay type: binding, target type: single  
722 protein, taxon: metazoa, standard value: < 10  $\mu$ M for active/interacting pairs and > 20  $\mu$ M  
723 for inactive/non-interacting pairs). We only selected the data points with a pChEMBL value,  
724 which corresponds to a calculated activity measure of half-maximal response  
725 concentration/potency/affinity (e.g., IC<sub>50</sub>, EC<sub>50</sub>, AC<sub>50</sub>, XC<sub>50</sub>, Ki, Kd, and potency) in the  
726 negative logarithmic scale. pChEMBL value of 5 is equal to an IC<sub>50</sub> measurement of 10  $\mu$ M.  
727 The presence of a pChEMBL value indicates that the data point has been checked by a  
728 curator. Following the elimination of duplicates, the final ChEMBL set contained 718,102  
729 bioactivity data points (627,353 actives and 90,749 inactives) between 3,533 target proteins  
730 and 467,658 compounds.

731 Due to the structural organization of the PubChem bioassay database, it was not  
732 straightforward to obtain a bioactivity dataset with desired properties. However, the  
733 developers of ExCAPE-DB solved this problem by extensively filtering and organizing  
734 PubChem bioactivity data (together with ChEMBL bioactivity data) and presented the results  
735 in a database [45]. ChEMBL v20 and the PubChem bioassay database (January 2016) are  
736 incorporated in ExCAPE. In our study, we incorporated PubChem bioactivities directly using  
737 the ExCAPE-DB. We discarded the PubChem data points where the actual bioactivity values  
738 were missing. These points could have been included using the assay outcome field, where  
739 each data point is already marked as either "active" or "inactive"; however, the test  
740 concentrations for these data points are not available, and it is probable that many of them  
741 do not obey the thresholds we determined. Following the elimination of data points with  
742 activity values between 10 and 20  $\mu$ M, the final ExCAPE bioactivity dataset contained  
743 2,514,439 bioactivity values between 1,648 target proteins and 856,216 compounds. The  
744 reason behind the low number of target proteins compared to the ChEMBL dataset was that,  
745 in ExCAPE, only three organisms (i.e., human, mouse and rat) were included. Finally,

746 ChEMBL v23 and ExCAPE datasets were merged to obtain the finalized bioactivity training  
747 dataset of the study. Since ExCAPE-DB incorporates ChEMBL data (from v20, which is an  
748 older version compared to the one we used) along with PubChem, many duplicates were  
749 added to our dataset following merging, which were eliminated by simply deleting repeat  
750 data points. Our finalized source bioactivity dataset contains 2,869,943 data points between  
751 3,644 target proteins and 1,033,581 compounds. 1,637,599 of these data points are in the  
752 actives class, and the remaining 1,232,344 are in the inactives class. The contradictions  
753 between active and inactive classes (i.e., compound – protein pairs that are listed both as  
754 active and inactive) are low, with only 1,574 cases (< 0.06%).

755 UniProt Knowledgebase -UniProtKB- v2019\_01 [25] and InterPro v72 database [20] were  
756 employed as the source for target protein sequences and their domain annotations,  
757 respectively. InterPro integrates sequence signatures with functional significance from 13  
758 different manually curated and automated databases presenting functional and structural  
759 protein information. In InterPro, domain content, order and positions are pre-computed for  
760 each UniProtKB protein sequence using the InterProScan tool and the sequence  
761 profiles/HMMs and presented within a public dataset. We downloaded InterPro annotations  
762 for all of the target proteins in our dataset (i.e., 3,644) and eliminated the InterPro hits for  
763 non-domain type entries such as families and sites. A total of 3,118 target proteins had at  
764 least one InterPro domain hit, and thus, could be further used in our study. The average  
765 number of domains in these target proteins was 2.44. We also generated domain  
766 architectures, which can be defined as the linear arrangement of the domain hits on the  
767 protein sequence, for each multi-domain protein in our dataset. The domain architecture  
768 information is later used for mapping compounds to domain pairs, to account for the cases  
769 where multiple domains are required to be presented in the protein to have an interaction  
770 with the corresponding compound (the detailed procedure is described below).

771 Canonical SMILES notations were employed to represent the compounds. SMILES is a  
772 widely used system that defines the structures of chemical species as line notations [46].

773 SMILES representations of all compounds in our dataset were directly downloaded from  
774 ChEMBL and PubChem databases. Extended-Connectivity Fingerprints (ECFP4) [47] were  
775 generated for all compounds in our bioactivity dataset (i.e., 1,033,581), using SMILES as the  
776 input. Pairwise molecular similarities were measured between all compound pair  
777 combinations using the Tanimoto coefficient. Python RDKit module [48] and ChemFP library  
778 [49] were employed to generate the fingerprints and to calculate the pairwise molecular  
779 similarities.

## 780 **4.2 DTI Prediction System**

781 The proposed prediction system contains two modules: compound – domain mapping  
782 (section 4.2.1) and the propagation of associations to other proteins and compounds  
783 (section 4.2.2). In the mapping module, small molecule drugs/compounds are  
784 probabilistically associated to single domains (or domain pairs) on target proteins, using  
785 experimentally verified compound – target interaction data in bioactivity data resources. In  
786 the second module, for each compound – domain pair, all proteins that contain the mapped  
787 domain and all compounds that are significantly similar to the mapped compound (in terms  
788 of molecular similarity) are crossed with each other to produce new drug/compound – target  
789 protein predictions.

### 790 4.2.1 Compound – domain mapping

791 Figure 1a displays the overall methodology within a schematic representation. In this  
792 example, a compound ( $C_i$ ) and its target protein ( $P_1$ ) is reported to be interacting/bioactive  
793 (i.e., according to our definition of active;  $x_{C_{50}} < 10 \mu\text{M}$ ) in ChEMBL and/or PubChem. In this  
794 toy example, it has been identified from the InterPro database that  $P_1$  has one domain  
795 annotation (i.e., blue domain), on which the binding site/region of  $C_i$  (with the desired  
796 bioactivity) is assumed to reside. It may also be possible that there is a functional  
797 relationship between the blue domain and  $C_i$ . This makes other human proteins containing  
798 the blue domain (i.e.,  $P_2$ ,  $P_3$ , and  $P_4$ ) candidate targets for  $C_i$  and for other drug-like

799 compounds that are significantly similar to  $C_i$  with Tanimoto similarity greater than or equal  
800 to 0.8 (i.e.,  $C_x$ ,  $C_y$ , and  $C_z$ ).

801 To quantize the association between a compound and a domain, we calculated mapping  
802 scores for each compound – domain combination, using verified active and inactive  
803 compound – target protein data points in our source ChEMBL + PubChem bioactivity  
804 dataset. For this, precision, recall, accuracy, F1-score, and Matthew's correlation coefficient  
805 (MCC) metrics are employed. MCC successfully measures the quality of binary  
806 classifications when there is a class imbalance [50], such as the case observed in our  
807 dataset. Here, binary classification is the decision for either the presence or absence of a  
808 bio-interaction between a compound and a domain. Definitions below are used to calculate  
809 mapping scores for an example compound ( $C_1$ ) and a domain ( $D_x$ ):

- 810 • True positives (TP) represent the number of proteins that contain domain  $D_x$ , where  
811 the reported bioactivity against compound  $C_1$  is within the actives portion (i.e.,  $x_{C_{50}} <$   
812  $10 \mu\text{M}$ ),
- 813 • False positives (FP) represent the number of proteins that contain domain  $D_x$ , where  
814 the reported bioactivity against compound  $C_1$  is within the inactives portion (i.e.,  $x_{C_{50}} >$   
815  $20 \mu\text{M}$ ),
- 816 • False negatives (FN) represent the number of proteins that do not contain domain  $D_x$ ,  
817 where the reported bioactivity against compound  $C_1$  is within the actives portion (i.e.,  
818  $x_{C_{50}} < 10 \mu\text{M}$ ),
- 819 • True negatives (TN) represent the number of proteins that do not contain domain  $D_x$ ,  
820 where the reported bioactivity against compound  $C_1$  is within the inactives portion (i.e.,  
821  $x_{C_{50}} > 20 \mu\text{M}$ ).

822 Mapping score metrics are calculated using the above-defined TP, FP, FN, and TN; and  
823 their formulations are provided in Methods section 4.3. For all the compound – domain

824 mappings, high scores indicate reliable mappings and a high probability that the region of  
825 interaction lies on the mapped domain. In Figure 1b, the mapping procedure is shown for 2  
826 toy examples. Also, in Figure 1b, the number of TP, FP, FN, and TN for toy examples are  
827 given, together with the respective mapping scores (i.e., metrics). The first example  
828 corresponds to a case where there are 2 experimentally verified interacting (i.e., active)  
829 target proteins for compound  $C_1$ . Both of these proteins contain the blue domain (i.e., a  
830 structural unit responsible for the interaction with  $C_1$ ).  $C_1$  also has 3 inactive proteins (i.e.,  
831 targets with insufficient bioactivity), 2 of which contain the red domain and 1 contains the  
832 light green domain. With the selection of the domain with the maximum score, the blue  
833 domain is mapped to  $C_1$ . Another example mapping case is presented for compound  $C_2$ ,  
834 where most of the known targets are multi-domain proteins. For  $C_2$ , many of the targets  
835 contain the green domain, red domain, or both of them. Association scores for single  
836 domains and domain pairs revealed that the best score is achieved when green and red  
837 domains exist together. It is observed that the real-world cases can be much more  
838 complicated compared to the toy examples provided in Figure 1b, as one protein can be the  
839 target of multiple compounds and one compound can target multiple proteins. To be able to  
840 separate reliable mappings from the non-reliable ones we determined and applied mapping  
841 score thresholds using the metrics provided in section 4.3. The test applied to determine  
842 these thresholds is described (together with its results) in the Results section 2.1.

843 With the purpose of increasing the reliability of the data in our verified bioactivity dataset, we  
844 directly eliminated the mappings to the compounds if the number of active and inactive  
845 targets is less than 3 (each). This filter was applied to eliminate the compounds with only a  
846 few data points, which could otherwise produce false high mapping scores. This application  
847 dramatically reduced the number of compounds in our source dataset from 1,033,581 to  
848 51,750. To be able to incorporate more data points, we generated a second dataset by  
849 combining the active and inactive targets of the compounds in clusters, which were  
850 significantly similar to each other in terms of molecular structure, and treated each cluster as

851 an individual compound while calculating the mapping scores. To distribute the compounds  
852 in clusters we used pairwise molecular similarities via Tanimoto coefficient (over ECFP4  
853 fingerprints) with a threshold of 0.7, which was above the previously applied threshold to  
854 predict targets based on compound molecular similarities [51]. All compounds that were  
855 similar to each other with at least 0.7 Tanimoto similarity were placed in the same cluster.  
856 Clusters with less than 5 active and 5 inactive targets were directly eliminated to ensure  
857 reliability in terms of the number of data points. In this way, 202,238 clusters were generated  
858 with compound overlaps in-between. This procedure should not be confused with compound  
859 similarity-based propagation of target protein associations, which is explained in section  
860 4.2.2. The mapping score calculation was carried out for all of the 51,750 individual  
861 compounds in our first dataset (i.e., single-compound-based mappings) and for 202,238  
862 clusters in our second dataset (i.e., compound-cluster-based mappings) against domains of  
863 their respective target proteins. For the compound-cluster-based analysis, the score  
864 obtained for each domain mapping was propagated to all compounds in the corresponding  
865 cluster. This resulted in a total of 3,487,239 raw compound – domain mappings for the  
866 cluster-based bioactivity dataset (i.e., compound-cluster-based mappings) and 449,294 raw  
867 mappings for the individual compound-based dataset (i.e., single-compound-based  
868 mappings). Figure 7 displays the histograms composed of bins of the total number of  
869 targets, the number of active targets, and the number of inactive targets (X-axis), for  
870 individual compounds (Figure 7a, b, c) and for compound clusters (Figure 7d, e, f). Y-axis  
871 represents the number of compounds or compound clusters in the log scale. As observed,  
872 there was a steady decrease in the number of compounds/clusters when the number of  
873 targets per compound/cluster was increased. There was also a clear difference between  
874 active and inactive target bins, indeed no individual compound or cluster with higher than 80  
875 inactive targets were identified. The most probable reason for this was that, negative results  
876 (i.e., non-interactions) are not usually reported in the literature. The gain from using  
877 compound clusters was highlighted especially for active targets and for all targets (i.e., a vs.  
878 d and b vs. e) with the increase in the height of the bars for more than 50 targets (notice the



879 scaling difference in the X-axis between the individual compound histograms and the  
880 compound cluster histograms).

881 **Figure 7.** Log-scale histograms of the number of individual compounds and compound  
882 clusters (Y-axis) with the given number of target proteins (X-axis) in our source bioactivity  
883 dataset; for individual compounds: **(a)** all targets, **(b)** active targets, **(c)** inactive targets; and  
884 for compound clusters: **(d)** all targets, **(e)** active targets, **(f)** inactive targets.

885 A similar procedure was applied to map compounds to domain pairs. For this, all domain  
886 pair combinations were identified for each target protein in our source dataset, using the  
887 domain architecture information of the proteins extracted using the UniProt-DAAC method,  
888 which was described in our previous study [52]. All domain pairs were recorded as if they  
889 were single domains and the mapping procedure explained above was applied to obtain  
890 compound – domain pair mappings. This procedure yielded a total of 1,075,550 raw  
891 individual compound – domain pair mappings and 9,343,130 raw compound cluster –  
892 domain pair mappings. The high number (compared to single domain mappings) was due to  
893 the elevated number of domain pair combinations, especially for large proteins.

894 Once the mapping score threshold had been selected (as explained in Results section 2.1),  
895 all mappings below the threshold were discarded, and the remaining mappings constituted  
896 the finalized mapping dataset.

#### 897 4.2.2 Propagation of associations

898 The second module starts with the detection of pairwise similarities between all compounds  
899 in our source dataset using molecular fingerprints. For this, Extended-Connectivity  
900 Fingerprints (ECFP4) [47] were generated for all compounds in our bioactivity dataset (i.e.,  
901 1,033,581). The pairwise similarities were measured using the Tanimoto coefficient with a  
902 threshold of 0.8 to signify significant similarities, which was even above the previously  
903 applied Tanimoto thresholds to safely transfer target annotations between small molecule  
904 compounds [51]. Briefly, domain associations that were produced in the previous step were

905 transferred to new compounds that are similar to the mapped compound with a Tanimoto  
906 similarity value greater than equal to 0.8. The idea behind this application was that the  
907 structurally similar molecules tend to have similar interactions, as assumed in conventional  
908 ligand-based virtual screening [47].

909 Subsequently, all human protein records in the UniProtKB/Swiss-Prot database were  
910 searched for the mapped domains and domain pairs, using the InterPro domain annotation  
911 information. When a new protein was found to contain the domain in question, it was  
912 associated with the corresponding compound. In this way, new candidate ligands were  
913 predicted for both known targets and for new candidate target proteins that possess the  
914 mapped domains or domain pairs (Figure 1a).

#### 915 **4.3 Mapping Score and Performance Analysis Metrics**

916 Precision, recall, accuracy, F1-score, and Matthew's correlation coefficient (MCC) metrics  
917 are used for both the calculation of mappings scores (Methods section 4.2.1) and calculation  
918 of the overall system performance (Results section 2.1). The formulation of these metrics  
919 are as follows:

920

$$921 \quad \textit{Precision} = \frac{TP}{TP + FP} \quad (1)$$

$$922 \quad \textit{Recall} = \frac{TP}{TP + FN} \quad (2)$$

$$923 \quad \textit{Accuracy} = \frac{TP + TN}{TP + FN + FP + FN} \quad (3)$$

$$924 \quad \textit{F1 - Score} = \frac{2 \times \textit{Precision} \times \textit{Recall}}{\textit{Precision} + \textit{Recall}} \quad (4)$$

$$925 \quad \textit{MCC} = \frac{TP \times TN - FP \times FN}{\sqrt{(TP + FP) \times (TP + FN) \times (TN + FP) \times (TN + FN)}} \quad (5)$$

926 Definitions for TP (i.e., true positives), FN (i.e., false negatives), FP (i.e., false positives) and  
927 TN (i.e., true negatives) are given in Method section 4.2.1.

#### 928 **4.4 Molecular Docking Experiments**

929 For the molecular docking of predicted inhibitor compounds and their derivatives against  
930 kinase domains of LIMK1 and LIMK2 proteins, the crystal structure of LIMK1 kinase domain  
931 as a complex with staurosporine (PDB id: 3S95) and the crystal structure of LIMK2 kinase  
932 domain complex with bound 9D8 (PDB id: 5NXD) were retrieved from RCSB PDB database  
933 [53]. Then, the PDB files of both protein structures were loaded into AutoDockTools-1.5.6.  
934 For both proteins, which are in the form of 2-chain homodimer structures, only the A chain  
935 was kept for docking and preprocessed by deleting all heteroatoms, adding hydrogen atoms,  
936 computing Gasteiger charges, and merging non-polar hydrogens. The preprocessed protein  
937 structures were saved as pdbqt files. For flexible docking, contact residues of LIMK1 and  
938 LIMK2 proteins were selected and saved as flexible pdbqt files, while the remaining  
939 structures of the proteins were saved as rigid pdbqt files.

940 Full 3D structures of compounds were downloaded from ZINC (v15) database [54] in sdf file  
941 format and converted to PDB files by Open Babel file format converter [55]. Since the  
942 derivative compounds (i.e., LIMKi-2a, LIMKi-2b, LIMKi-2c, LIMKi-2d) could not be found in  
943 the ZINC database, compound 3D structures (in the form of PDB files) were generated from  
944 the SMILES representations of respective compounds using ChemAxon JChem software-  
945 based online tool at: <http://pasilla.health.unm.edu/tomcat/biocomp/convert>. Then, Gasteiger  
946 charges were added, rotatable bonds and the root for the identification of a central atom  
947 were detected for compound PDB structures, and they were saved as pdbqt files in  
948 AutoDockTools.

949 Grid map files for both rigid and flexible dockings were generated by AutoGrid4 program  
950 (AutoDock-4.2.6) [56] using protein and compound pdbqt files as inputs, and the x-y-z  
951 coordinates for the grid search were defined by calculating the mean coordinates of the

952 reported interacting atoms of LIMK1 and LIMK2 proteins, which were retrieved from  
953 PDBsum [57]. Grid box parameters for grid search were set as shown in Table 3a. In the  
954 docking step, a genetic algorithm with default settings was used for parameter searching,  
955 and the docking analysis of each compound – protein pair was carried out by using  
956 AutoDock4 (v4.2.6) [56].

957 As a second docking validation, the same analysis was also performed by using  
958 MTiAutoDock [58] and SwissDock [59] web services. Protein pdb files were given as an  
959 input to the MTiAutoDock service together with the sdf formatted ligand structure files. List of  
960 residues mode was selected for grid calculation and the contact residues of each protein  
961 was given as input. MTiAutoDock service has automatically added the hydrogen atoms to  
962 the crystal structure and executed the docking procedure using AutoDock 4.2.6. For  
963 SwissDock, blind docking was implemented using protein PDB files and ligand mol2 files as  
964 input. For all docking analyses, different poses were evaluated via binding free energy  
965 calculations and the one with the lowest energy was selected as the finalized result (i.e., the  
966 best pose). UCSF Chimera software was used for the visualization of docking results.

#### 967 **4.5 Chemical Synthesis of the Predicted Inhibitors**

968 DRUIDom predicted 4 compounds as inhibitors of LIMK1 and LIMK2 proteins, which have  
969 been selected as targets of the validation use-case study. Structures, database identifiers,  
970 and given names (by us) of these compounds (i.e., LIMKi-1, LIMKi-1a, LIMKi-2, LIMKi-3) are  
971 displayed in Figure 2. We synthesized these molecules to be used in the cell-based assays.  
972 Also, the structure of LIMKi-2 has been modified with the aim of building 4 new derivatives  
973 with a potentially higher biological activity (i.e., shown in Figure 2 as LIMKi-2a, LIMKi-2b,  
974 LIMKi-2c, LIMKi-2d), making a total of 8 molecules. Procedures used in the chemical  
975 synthesis of these molecules are given in the Supplementary Material document.

#### 976 **4.6 *In vitro* Experimental Assays**

977 All LIMKi (LIM-Kinase Inhibitor) compounds were dissolved in DMSO and stored at -20 °C as  
978 20 mM stocks.

#### 979 4.6.1 Cell Culture

980 Human hepatocellular carcinoma cell lines (Huh7, Mahlavu), colon carcinoma cell line  
981 (HCT116), breast cancer cell line (MCF-7) were maintained in Dulbecco's Modified Eagle  
982 Media (DMEM) (Gibco, Cat:31885-023): together with 10% FBS (Gibco, Cat:10270), 1%  
983 Non-essential Amino Acid (MEM-NEAA) (Gibco, Cat:11140-050) and 1% Penicillin-  
984 Streptomycin (Gibco, Cat:15140-122); whereas human embryonic kidney cell line (HEK-293)  
985 was maintained in same reagents described above together with 100 µg/ml Hygromycin B  
986 (Invitrogen, Cat: 10687-010) at 37°C under 5% CO<sub>2</sub>. All cells used in this study are STR  
987 authenticated and regularly tested for contamination with the mycoplasma test kit  
988 (MycoAlert™, Lonza, Cat:LT07-118).

#### 989 4.6.2 SRB (Sulforhodamine B) Assay

990 Cells were collected with trypsinization after washed with PBS once. Collected cells seeded  
991 in 96-well cell culture plate, adjusted with 150 µl/well as followed; Huh-7 (2500 cells/well),  
992 Mahlavu (1500 cells/well), HCT-116 (2000 cells/well), MCF-7 (2000 cells/well) and Hek-293  
993 (3000 cells/well). LIMKi compounds were administered in the range of concentration from 40  
994 µM to 2,5 µM, 24 hours later from the initial seeding step. After 72 hours of treatment, cells  
995 were fixed with 10% trichloroacetic acid (TCA;Sigma, Cat:27242) and proteins were stained  
996 with 0,4% sulforhodamine B sodium salt (SRB; Sigma, Cat: S1402) solution, dissolved in 1%  
997 acetic acid (Sigma, Cat: 27225) [60]. Plates were read on BMG SpectroStar Nano  
998 Spectrophotometer at 515nm. IC<sub>50</sub> values were calculated based on the normalization  
999 according to DMSO-treated (Sigma, Cat: D2650) groups.

#### 1000 4.6.3 Western Blotting

1001 500.000 cells of Huh7 and 250.000 cells of Mahlavu were seeded in 150 mm cell culture  
1002 dishes (Sarstedt, Cat: 83.3903). After 24 hours, the old media was removed and fresh media

1003 containing 20  $\mu$ M of each LIMK inhibitor were added. All treatments were performed as  
1004 duplicates for 48 hours. At the end of the treatment, cells were scraped and protein  
1005 extraction was performed. Protein Electrophoresis (Bio-Rad, Mini-PROTEAN® Tetra Cell  
1006 Systems and TGX precast gels) and transfer system (Bio-Rad, Trans-Blot Turbo Transfer  
1007 System) were used according to the manufacturer's protocol. Proteins were transferred to a  
1008 PVDF-LF membrane (Bio-Rad, Cat:1620260) Following antibodies were used as described  
1009 within western blotting protocol. phospho-Cofilin (CST, Cat: 3313) (1:200 v/v), Total Cofilin  
1010 (CST, Cat:5175) (1:200 v/v), and IRDye® 800CW Goat-anti-Rabbit IgG Secondary Antibody  
1011 (LI-COR, Cat:926-32211) (1:20000 v/v). For normalization, REVERT™ 700 Total Protein  
1012 Stain Kit (LI-COR, Cat:926-11016) was used according to the manufacturer's protocol.  
1013 Images were taken with LI-COR Odyssey Clx Imaging Device. Signal normalization was  
1014 performed based on the REVERT™ Total Protein Stain Normalization protocol by LI-COR  
1015 Biosciences and imaging analysis was performed by LI-COR, Image Studio Lite software.  
1016 For efficiency testing for LIMKi compounds with IC<sub>100</sub> dosages; anti-rabbit IgG (Sigma, Cat:  
1017 A6154) was used as a secondary antibody (1:5000 v/v), and for imaging; SuperSignal West  
1018 Femto (Thermo Scientific; Cat: 34095) was used. Imaging was acquired by using LI-COR C-  
1019 DiGit® Blot Scanner. Signal intensity analysis was performed by LI-COR, Image Studio Lite  
1020 software.

#### 1021 4.6.4 Scratch Assay

1022 Huh7 (150.000 cells) and Mahlavu (100.000 cells) cells were seeded to 35 mm cell culture  
1023 dishes (Corning, Cat:430165) and incubated for at least 24h until cells attached and became  
1024 confluent. The wound was created in confluent (nearly 100%) monolayer cells by using p30  
1025 pipet tip followed by washing with PBS (Gibco, Cat: 14190-169) three times before adding  
1026 the serum-free medium (1% FBS) that includes LIMK inhibitors or vehicle DMSO. The  
1027 migration rate of LIMK inhibitor-treated cells was analyzed by comparing samples with the  
1028 migration of control cells treated with DMSO controls. Gap closure was analyzed by  
1029 capturing images with time-lapse Nikon ECLIPSE Ti-S inverted microscopy for 10 min

1030 intervals for 10 hours (high-quality images of the treated cells are given in the data  
1031 repository of the study). Upon 10 hours the distance of the same reference point measured  
1032 at the first and last frame were compared by using NIS-Elements software.

#### 1033 4.6.5 Real-Time Cell invasion Analysis

1034 Cells were seeded on CIM-Plate 16™ (ACEA, Cat: 05 665 817 001), (20.000 cells/well for  
1035 Mahlavu and 50.000 cells/well for Huh7 as triplicates) and monitored their invasion capacity  
1036 on xCELLigence DP RTCA System, in the presence of 20 µM LIMKi compounds. The lower  
1037 chamber of CIM-Plate was filled with 160 µl DMEM containing 10% FBS. Cells were  
1038 resuspended with LIMKi compounds in serum-free DMEM (1% FBS, 1% NEAA, and 1%  
1039 Penicillin / Streptomycin) and inoculated into the upper chamber in 150 ul as final volume.  
1040 After the inoculation, CIM-Plate was incubated at room temperature for 30 min to allow the  
1041 cells to settle; then the system was initiated to record CI data for 48 hours with 15-minute  
1042 intervals. CI values were used to represent time-dependent invasion patterns of cells.

#### 1043 4.6.6 Statistical Analysis

1044 All SRB and migration data in this study were obtained from three independent experiments  
1045 with  $n \geq 3$  biological replicates. Western Blot experiments were performed as duplicates with  
1046 3 independent experiments. The statistical analysis for Western Blot was performed using  
1047 Welch's *t*-test (Prism, GraphPad) and for the migration assay, Two-way ANOVA (Prism,  
1048 GraphPad) was performed. Standard deviations of IC<sub>50</sub> results from SRB Assay and from  
1049 real-time cell proliferation data were calculated on Microsoft Excel. Statistically significant  
1050 results were represented as follows: \*: p-value <0.05; \*\*: p-value <0.01; \*\*\*: p-value <0.001;  
1051 and \*\*\*\*: p-value <0.0001.

1052



## 1053 **References**

- 1054 1. Paul SM, Mytelka DS, Dunwiddie CT, Persinger CC, Munos BH, Lindborg SR, Schacht  
1055 AL. How to improve R&D productivity: the pharmaceutical industry's grand challenge.  
1056 Nature reviews Drug discovery. 2010 Mar;9(3):203-14.
- 1057 2. Hopkins AL. Predicting promiscuity. Nature. 2009 Nov;462(7270):167-8.
- 1058 3. Bredel M, Jacoby E. Chemogenomics: an emerging strategy for rapid target and drug  
1059 discovery. Nature Reviews Genetics. 2004 Apr;5(4):262-75.
- 1060 4. Rifaioğlu AS, Atas H, Martin MJ, Cetin-Atalay R, Atalay V, Doğan T. Recent applications  
1061 of deep learning and machine intelligence on in silico drug discovery: methods, tools  
1062 and databases. Briefings in bioinformatics. 2019 Sep;20(5):1878-912.
- 1063 5. Scior T, Bender A, Tresadern G, Medina-Franco JL, Martínez-Mayorga K, Langer T,  
1064 Cuanalo-Contreras K, Agrafiotis DK. Recognizing pitfalls in virtual screening: a critical  
1065 review. Journal of chemical information and modeling. 2012 Apr 23;52(4):867-81.
- 1066 6. Lin X, Li X, Lin X. A review on applications of computational methods in drug screening  
1067 and design. Molecules. 2020 Jan;25(6):1375.
- 1068 7. Shoichet BK. Virtual screening of chemical libraries. Nature. 2004 Dec;432(7019):862-5.
- 1069 8. Jacob L, Vert JP. Protein-ligand interaction prediction: an improved chemogenomics  
1070 approach. Bioinformatics. 2008 Oct 1;24(19):2149-56.
- 1071 9. Ghosh S, Nie A, An J, Huang Z. Structure-based virtual screening of chemical libraries  
1072 for drug discovery. Current opinion in chemical biology. 2006 Jun 1;10(3):194-202.
- 1073 10. Rifaioğlu AS, Nalbat E, Atalay V, Martin MJ, Cetin-Atalay R, Doğan T. DEEPScreen:  
1074 high performance drug–target interaction prediction with convolutional neural networks  
1075 using 2-D structural compound representations. Chemical science. 2020;11(9):2531-57.
- 1076 11. Keiser MJ, Roth BL, Armbruster BN, Ernsberger P, Irwin JJ, Shoichet BK. Relating  
1077 protein pharmacology by ligand chemistry. Nature biotechnology. 2007 Feb;25(2):197-  
1078 206.
- 1079 12. Yu H, Chen J, Xu X, Li Y, Zhao H, Fang Y, Li X, Zhou W, Wang W, Wang Y. A  
1080 systematic prediction of multiple drug-target interactions from chemical, genomic, and  
1081 pharmacological data. PloS one. 2012 May 30;7(5):e37608.

- 1082 13. Gfeller D, Grosdidier A, Wirth M, Daina A, Michielin O, Zoete V. SwissTargetPrediction:  
1083 a web server for target prediction of bioactive small molecules. *Nucleic acids research*.  
1084 2014 Jul 1;42(W1):W32-8.
- 1085 14. Zhou W, Wang Y, Lu A, Zhang G. Systems pharmacology in small molecular drug  
1086 discovery. *International journal of molecular sciences*. 2016 Feb;17(2):246.
- 1087 15. Talele TT, Khedkar SA, Rigby AC. Successful applications of computer aided drug  
1088 discovery: moving drugs from concept to the clinic. *Current topics in medicinal*  
1089 *chemistry*. 2010 Jan 1;10(1):127-41.
- 1090 16. Kim S, Chen J, Cheng T, Gindulyte A, He J, He S, Li Q, Shoemaker BA, Thiessen PA,  
1091 Yu B, Zaslavsky L. PubChem 2019 update: improved access to chemical data. *Nucleic*  
1092 *acids research*. 2019 Jan 8;47(D1):D1102-9.
- 1093 17. Mendez D, Gaulton A, Bento AP, Chambers J, De Veij M, Félix E, Magariños MP,  
1094 Mosquera JF, Mutowo P, Nowotka M, Gordillo-Marañón M. ChEMBL: towards direct  
1095 deposition of bioassay data. *Nucleic acids research*. 2019 Jan 8;47(D1):D930-40.
- 1096 18. Wetlaufer DB. Nucleation, rapid folding, and globular intrachain regions in proteins.  
1097 *Proceedings of the National Academy of Sciences*. 1973 Mar 1;70(3):697-701.
- 1098 19. El-Gebali S, Mistry J, Bateman A, Eddy SR, Luciani A, Potter SC, Qureshi M,  
1099 Richardson LJ, Salazar GA, Smart A, Sonnhammer EL. The Pfam protein families  
1100 database in 2019. *Nucleic acids research*. 2019 Jan 8;47(D1):D427-32.
- 1101 20. Mitchell AL, Attwood TK, Babbitt PC, Blum M, Bork P, Bridge A, Brown SD, Chang HY,  
1102 El-Gebali S, Fraser MI, Gough J. InterPro in 2019: improving coverage, classification  
1103 and access to protein sequence annotations. *Nucleic acids research*. 2019 Jan  
1104 8;47(D1):D351-60.
- 1105 21. Li Q, Cheng T, Wang Y, Bryant SH. Characterizing protein domain associations by  
1106 Small-molecule ligand binding. *Journal of proteome science and computational biology*.  
1107 2012 Dec 3;1.
- 1108 22. Kruger FA, Rostom R, Overington JP. Mapping small molecule binding data to structural  
1109 domains. In *BMC bioinformatics* 2012 Dec (Vol. 13, No. 17, pp. 1-13). BioMed Central.

- 1110 23. Kruger FA, Gaulton A, Nowotka M, Overington JP. PPDMs—a resource for mapping  
1111 small molecule bioactivities from ChEMBL to Pfam-A protein domains. *Bioinformatics*.  
1112 2015 Mar 1;31(5):776-8.
- 1113 24. Kobren SN, Singh M. Systematic domain-based aggregation of protein structures  
1114 highlights DNA-, RNA-and other ligand-binding positions. *Nucleic acids research*. 2019  
1115 Jan 25;47(2):582-93.
- 1116 25. UniProt Consortium. UniProt: a worldwide hub of protein knowledge. *Nucleic acids*  
1117 *research*. 2019 Jan 8;47(D1):D506-15.
- 1118 26. Ersahin T, Tuncbag N, Cetin-Atalay R. The PI3K/AKT/mTOR interactive pathway.  
1119 *Molecular BioSystems*. 2015;11(7):1946-54.
- 1120 27. Scott RW, Olson MF. LIM kinases: function, regulation and association with human  
1121 disease. *Journal of molecular medicine*. 2007 Jun 1;85(6):555-68.
- 1122 28. Mardilovich K, Baugh M, Crighton D, Kowalczyk D, Gabrielsen M, Munro J, Croft DR,  
1123 Lourenco F, James D, Kalna G, McGarry L. LIM kinase inhibitors disrupt mitotic  
1124 microtubule organization and impair tumor cell proliferation. *Oncotarget*. 2015 Nov  
1125 17;6(36):38469.
- 1126 29. Scott RW, Hooper S, Crighton D, Li A, König I, Munro J, Trivier E, Wickman G, Morin P,  
1127 Croft DR, Dawson J. LIM kinases are required for invasive path generation by tumor  
1128 and tumor-associated stromal cells. *Journal of Cell Biology*. 2010 Oct 4;191(1):169-85.
- 1129 30. Lagoutte E, Villeneuve C, Lafanechère L, Wells CM, Jones GE, Chavrier P, Rossé C.  
1130 LIMK regulates tumor-cell invasion and matrix degradation through tyrosine  
1131 phosphorylation of MT1-MMP. *Scientific reports*. 2016 Apr 27;6(1):1-2.
- 1132 31. Yoshioka K, Foletta V, Bernard O, Itoh K. A role for LIM kinase in cancer invasion.  
1133 *Proceedings of the National Academy of Sciences*. 2003 Jun 10;100(12):7247-52.
- 1134 32. Bu Z, Callaway DJ. Proteins move! Protein dynamics and long-range allostery in cell  
1135 signaling. *Advances in protein chemistry and structural biology*. 2011 Jan 1;83:163-221.
- 1136 33. England KS, Tumber A, Krojer T, Scozzafava G, Ng SS, Daniel M, Szykowska A, Che  
1137 K, von Delft F, Burgess-Brown NA, Kawamura A. Optimisation of a triazolopyridine  
1138 based histone demethylase inhibitor yields a potent and selective KDM2A (FBXL11)  
1139 inhibitor. *MedChemComm*. 2014;5(12):1879-86.

- 1140 34. Tang ZY. Hepatocellular carcinoma-cause, treatment and metastasis. World journal of  
1141 gastroenterology. 2001 Aug 15;7(4):445.
- 1142 35. Buontempo F, Ersahin T, Missiroli S, Senturk S, Etro D, Ozturk M, Capitani S, Cetin-  
1143 Atalay R, Neri ML. Inhibition of Akt signaling in hepatoma cells induces apoptotic cell  
1144 death independent of Akt activation status. Investigational new drugs. 2011  
1145 Dec;29(6):1303-13.
- 1146 36. Mizuno K. Signaling mechanisms and functional roles of cofilin phosphorylation and  
1147 dephosphorylation. Cellular signalling. 2013 Feb 1;25(2):457-69.
- 1148 37. Meng Y, Zhang Y, Tregoubov V, Janus C, Cruz L, Jackson M, Lu WY, MacDonald JF,  
1149 Wang JY, Falls DL, Jia Z. Abnormal spine morphology and enhanced LTP in LIMK-1  
1150 knockout mice. Neuron. 2002 Jul 3;35(1):121-33.
- 1151 38. Croft DR, Crighton D, Samuel MS, Lourenco FC, Munro J, Wood J, Bensaad K,  
1152 Vousden KH, Sansom OJ, Ryan KM, Olson MF. p53-mediated transcriptional regulation  
1153 and activation of the actin cytoskeleton regulatory RhoC to LIMK2 signaling pathway  
1154 promotes cell survival. Cell research. 2011 Apr;21(4):666-82.
- 1155 39. Dan S, Tsunoda T, Kitahara O, Yanagawa R, Zembutsu H, Katagiri T, Yamazaki K,  
1156 Nakamura Y, Yamori T. An integrated database of chemosensitivity to 55 anticancer  
1157 drugs and gene expression profiles of 39 human cancer cell lines. Cancer Research.  
1158 2002 Feb 15;62(4):1139-47.
- 1159 40. Po'Uha ST, Shum MS, Goebel A, Bernard O, Kavallaris M. LIM-kinase 2, a regulator of  
1160 actin dynamics, is involved in mitotic spindle integrity and sensitivity to microtubule-  
1161 destabilizing drugs. Oncogene. 2010 Jan;29(4):597-607.
- 1162 41. Gamell C, Schofield AV, Suryadinata R, Sarcevic B, Bernard O. LIMK2 mediates  
1163 resistance to chemotherapeutic drugs in neuroblastoma cells through regulation of drug-  
1164 induced cell cycle arrest. PLoS One. 2013 Aug 21;8(8):e72850.
- 1165 42. Llovet JM, Fuster J, Bruix J. The Barcelona approach: diagnosis, staging, and treatment  
1166 of hepatocellular carcinoma. Liver transplantation. 2004 Feb;10(S2):S115-20.
- 1167 43. Kahraman DC, Hanquet G, Jeanmart L, Lanners S, Šramel P, Boháč A, Cetin-Atalay R.  
1168 Quinoides and VEGFR2 TKIs influence the fate of hepatocellular carcinoma and its  
1169 cancer stem cells. MedChemComm. 2017;8(1):81-7.

- 1170 44. Yang J, Anishchenko I, Park H, Peng Z, Ovchinnikov S, Baker D. Improved protein  
1171 structure prediction using predicted interresidue orientations. Proceedings of the  
1172 National Academy of Sciences. 2020 Jan 21;117(3):1496-503.
- 1173 45. Sun J, Jeliazkova N, Chupakhin V, Golib-Dzib JF, Engkvist O, Carlsson L, Wegner J,  
1174 Ceulemans H, Georgiev I, Jeliazkov V, Kochev N. ExCAPE-DB: an integrated large  
1175 scale dataset facilitating Big Data analysis in chemogenomics. Journal of  
1176 cheminformatics. 2017 Dec;9(1):1-9.
- 1177 46. Weininger D. SMILES, a chemical language and information system. 1. Introduction to  
1178 methodology and encoding rules. Journal of chemical information and computer  
1179 sciences. 1988 Feb 1;28(1):31-6.
- 1180 47. Rogers D, Hahn M. Extended-connectivity fingerprints. Journal of chemical information  
1181 and modeling. 2010 May 24;50(5):742-54.
- 1182 48. Landrum G. RDKit: Open-source cheminformatics.
- 1183 49. Dalke A. The chemfp project. Journal of Cheminformatics. 2019 Dec;11(1):1-21.
- 1184 50. Powers DM. Evaluation: from precision, recall and F-measure to ROC, informedness,  
1185 markedness and correlation. arXiv preprint arXiv:2010.16061. 2020 Oct 11.
- 1186 51. Maggiora G, Vogt M, Stumpfe D, Bajorath J. Molecular similarity in medicinal chemistry:  
1187 miniperspective. Journal of medicinal chemistry. 2014 Apr 24;57(8):3186-204.
- 1188 52. Doğan T, MacDougall A, Saidi R, Poggioli D, Bateman A, O'Donovan C, Martin MJ.  
1189 UniProt-DAAC: domain architecture alignment and classification, a new method for  
1190 automatic functional annotation in UniProtKB. Bioinformatics. 2016 Aug 1;32(15):2264-  
1191 71.
- 1192 53. Burley SK, Berman HM, Bhikadiya C, Bi C, Chen L, Di Costanzo L, Christie C,  
1193 Dalenberg K, Duarte JM, Dutta S, Feng Z. RCSB Protein Data Bank: biological  
1194 macromolecular structures enabling research and education in fundamental biology,  
1195 biomedicine, biotechnology and energy. Nucleic acids research. 2019 Jan  
1196 8;47(D1):D464-74.
- 1197 54. Sterling T, Irwin JJ. ZINC 15—ligand discovery for everyone. Journal of chemical  
1198 information and modeling. 2015 Nov 23;55(11):2324-37.

- 1199 55. O'Boyle NM, Banck M, James CA, Morley C, Vandermeersch T, Hutchison GR. Open  
1200 Babel: An open chemical toolbox. *Journal of cheminformatics*. 2011 Dec;3(1):1-4.
- 1201 56. Morris GM, Huey R, Lindstrom W, Sanner MF, Belew RK, Goodsell DS, Olson AJ.  
1202 AutoDock4 and AutoDockTools4: Automated docking with selective receptor flexibility.  
1203 *Journal of computational chemistry*. 2009 Dec;30(16):2785-91.
- 1204 57. Laskowski RA, Jabłońska J, Právda L, Vařeková RS, Thornton JM. PDBsum: Structural  
1205 summaries of PDB entries. *Protein science*. 2018 Jan;27(1):129-34.
- 1206 58. Labbé CM, Rey J, Lagorce D, Vavruša M, Becot J, Sperandio O, Villoutreix BO, Tufféry  
1207 P, Miteva MA. MTiOpenScreen: a web server for structure-based virtual screening.  
1208 *Nucleic acids research*. 2015 Jul 1;43(W1):W448-54.
- 1209 59. Grosdidier A, Zoete V, Michielin O. SwissDock, a protein-small molecule docking web  
1210 service based on EADock DSS. *Nucleic acids research*. 2011 May  
1211 28;39(suppl\_2):W270-7.
- 1212 60. Kahraman DC, Kahraman T, Cetin-Atalay R. Targeting PI3K/Akt/mTOR pathway  
1213 identifies differential expression and functional role of IL8 in liver cancer stem  
1214 cell enrichment. *Molecular cancer therapeutics*. 2019 Nov 1;18(11):2146-57.

1215 **Figures**

1216 **(a)**

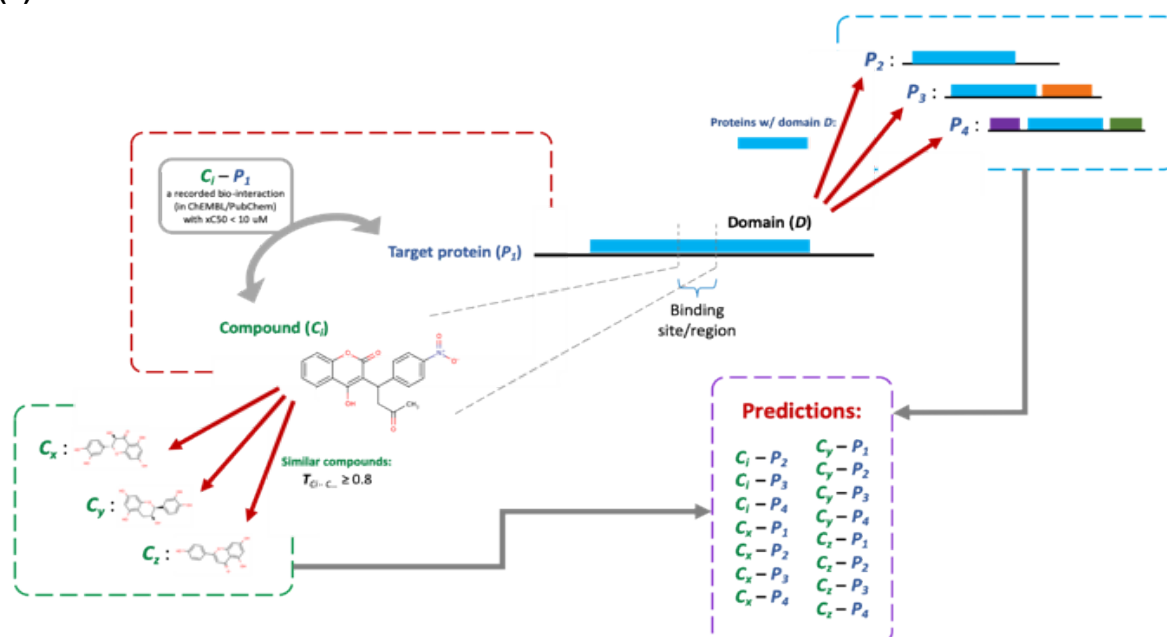

1217  
1218

**(b)**

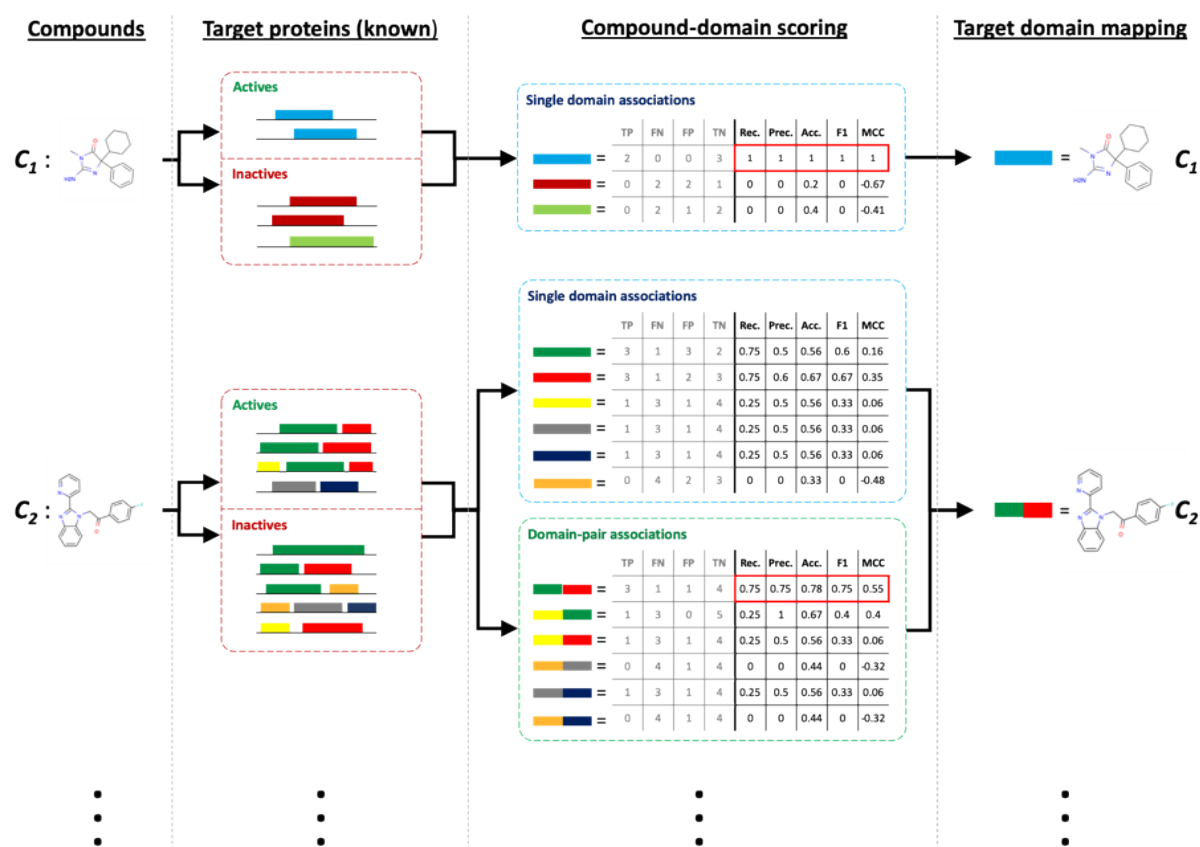

1219

1220 **Figure 1. (a)** The overall representation of the drug/compound – target protein interaction  
 1221 prediction approach used in DRUIDom (the diagram only depicts the relationship in terms of  
 1222 physical binding; however, DRUIDom also covers functional relationships between domains  
 1223 and compounds); **(b)** drug/compound – domain mapping procedure and its scoring over two  
 1224 representative ( $c_1$ ,  $c_2$ ) toy examples.



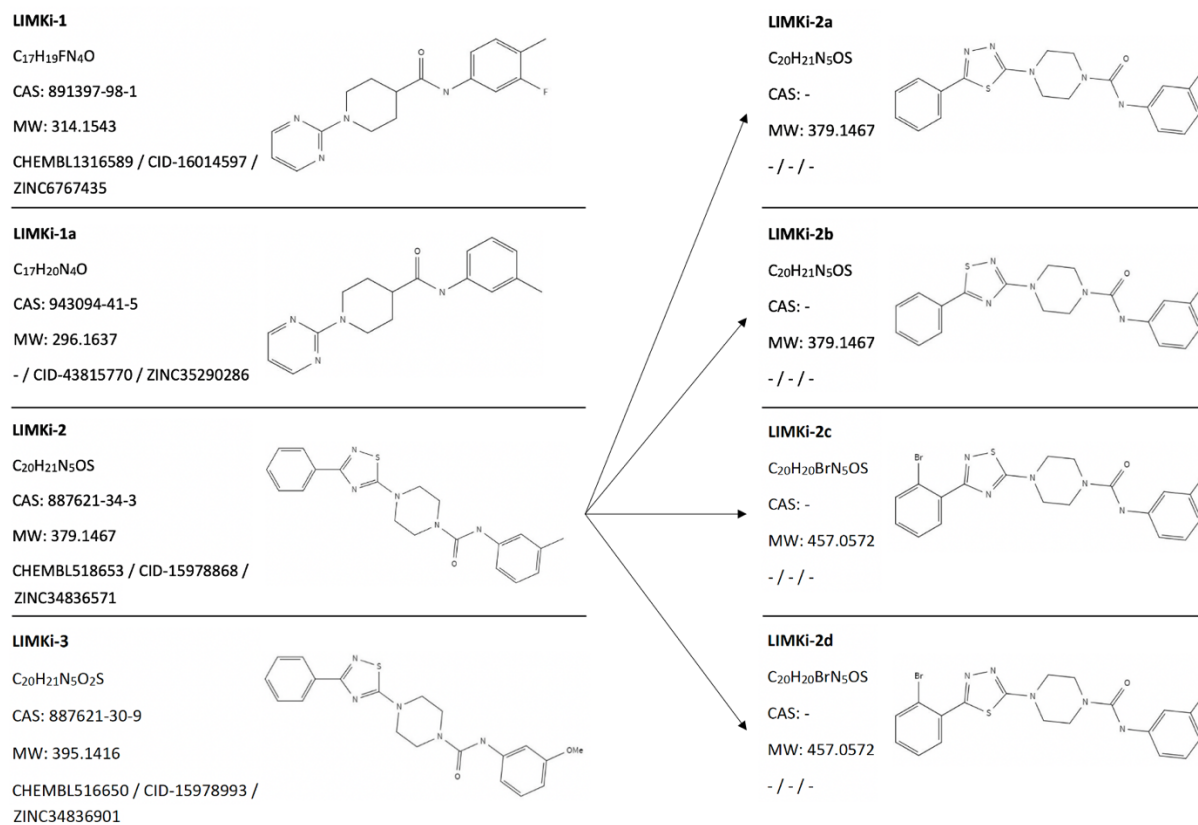

1225

1226 **Figure 2.** Structures, database identifiers, and 2-D representations of predicted LIMK  
1227 inhibitory compounds (LIMKi-1, 1a, 2, and 3) and derivatives (LIMKi-2a, b, c, and d).  
1228



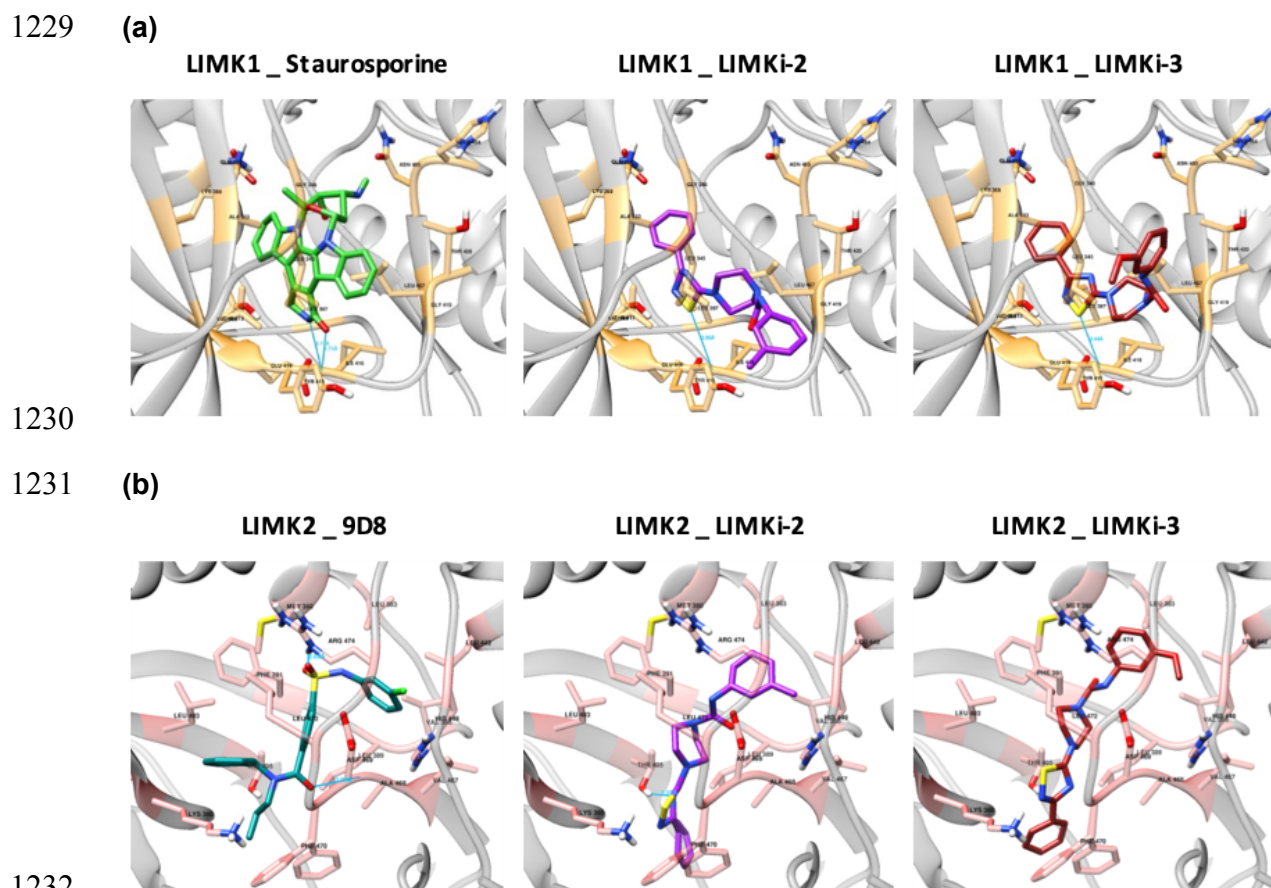

1233 **Figure 3.** Visualization of the docked complex structures of (a) LIMK1 kinase domain in  
1234 complex with the reference molecule staurosporine (green), LIMKi-2 (violet), and LIMKi-3  
1235 (red), and (b) LIMK2 kinase domain in complex with the reference molecule 9D8 (dark  
1236 cyan), LIMKi-2 (violet), and LIMKi-3 (red) at the best poses. Hydrogen bonds are displayed  
1237 with dark blue lines. Gold and pink colors represent LIMK1 and LIMK2 protein residues  
1238 interacting with the corresponding compounds.  
1239

1240

(a)

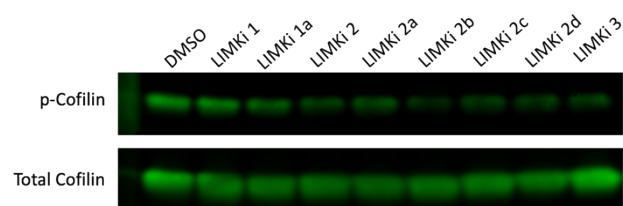

1241

1242

1243

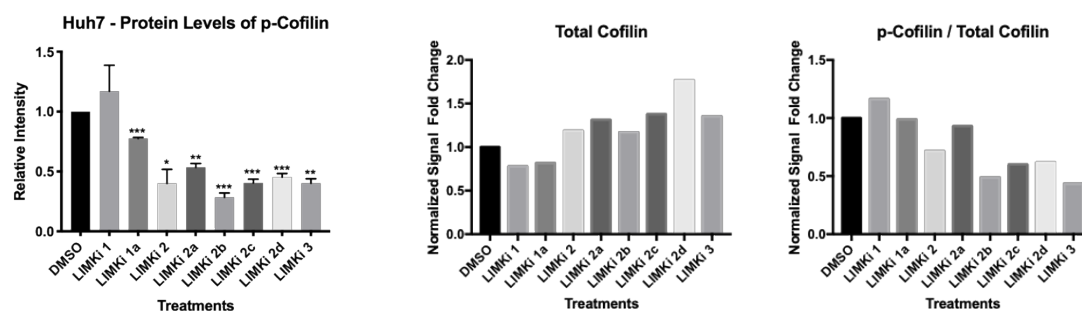

1244

1245

(b)

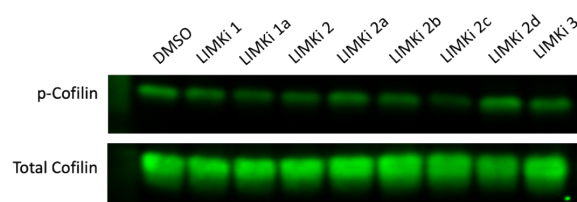

1246

1247

1248

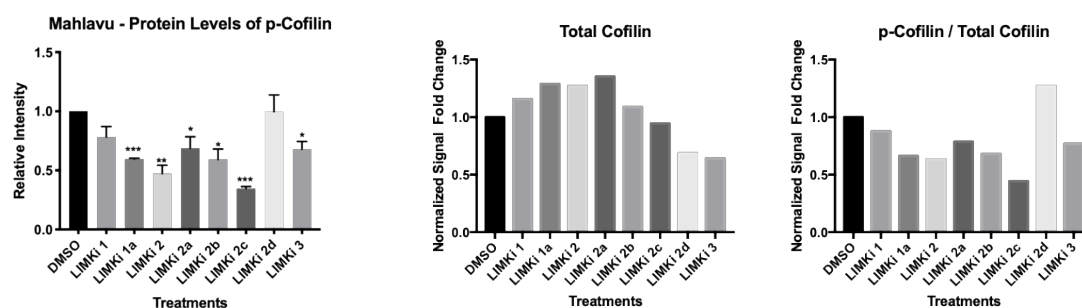

1249

1250 **Figure 4.** Phospho-Cofilin protein expression. (a) Huh7 and (b) Mahlavu cells were cultured  
 1251 with LIMK inhibitors (20  $\mu$ M) for 48 hours and expression of active p-Cofilin and total Cofilin  
 1252 levels were assessed with western blot analysis. Bar graph indicates the relative intensity of  
 1253 p-Cofilin levels compared to untreated DMSO controls. The equal loading control was  
 1254 analyzed based on the total protein staining normalization protocol. The ratio of phospho-  
 1255 and total Cofilin levels for both Mahlavu and Huh7 cell lines were calculated.

1256

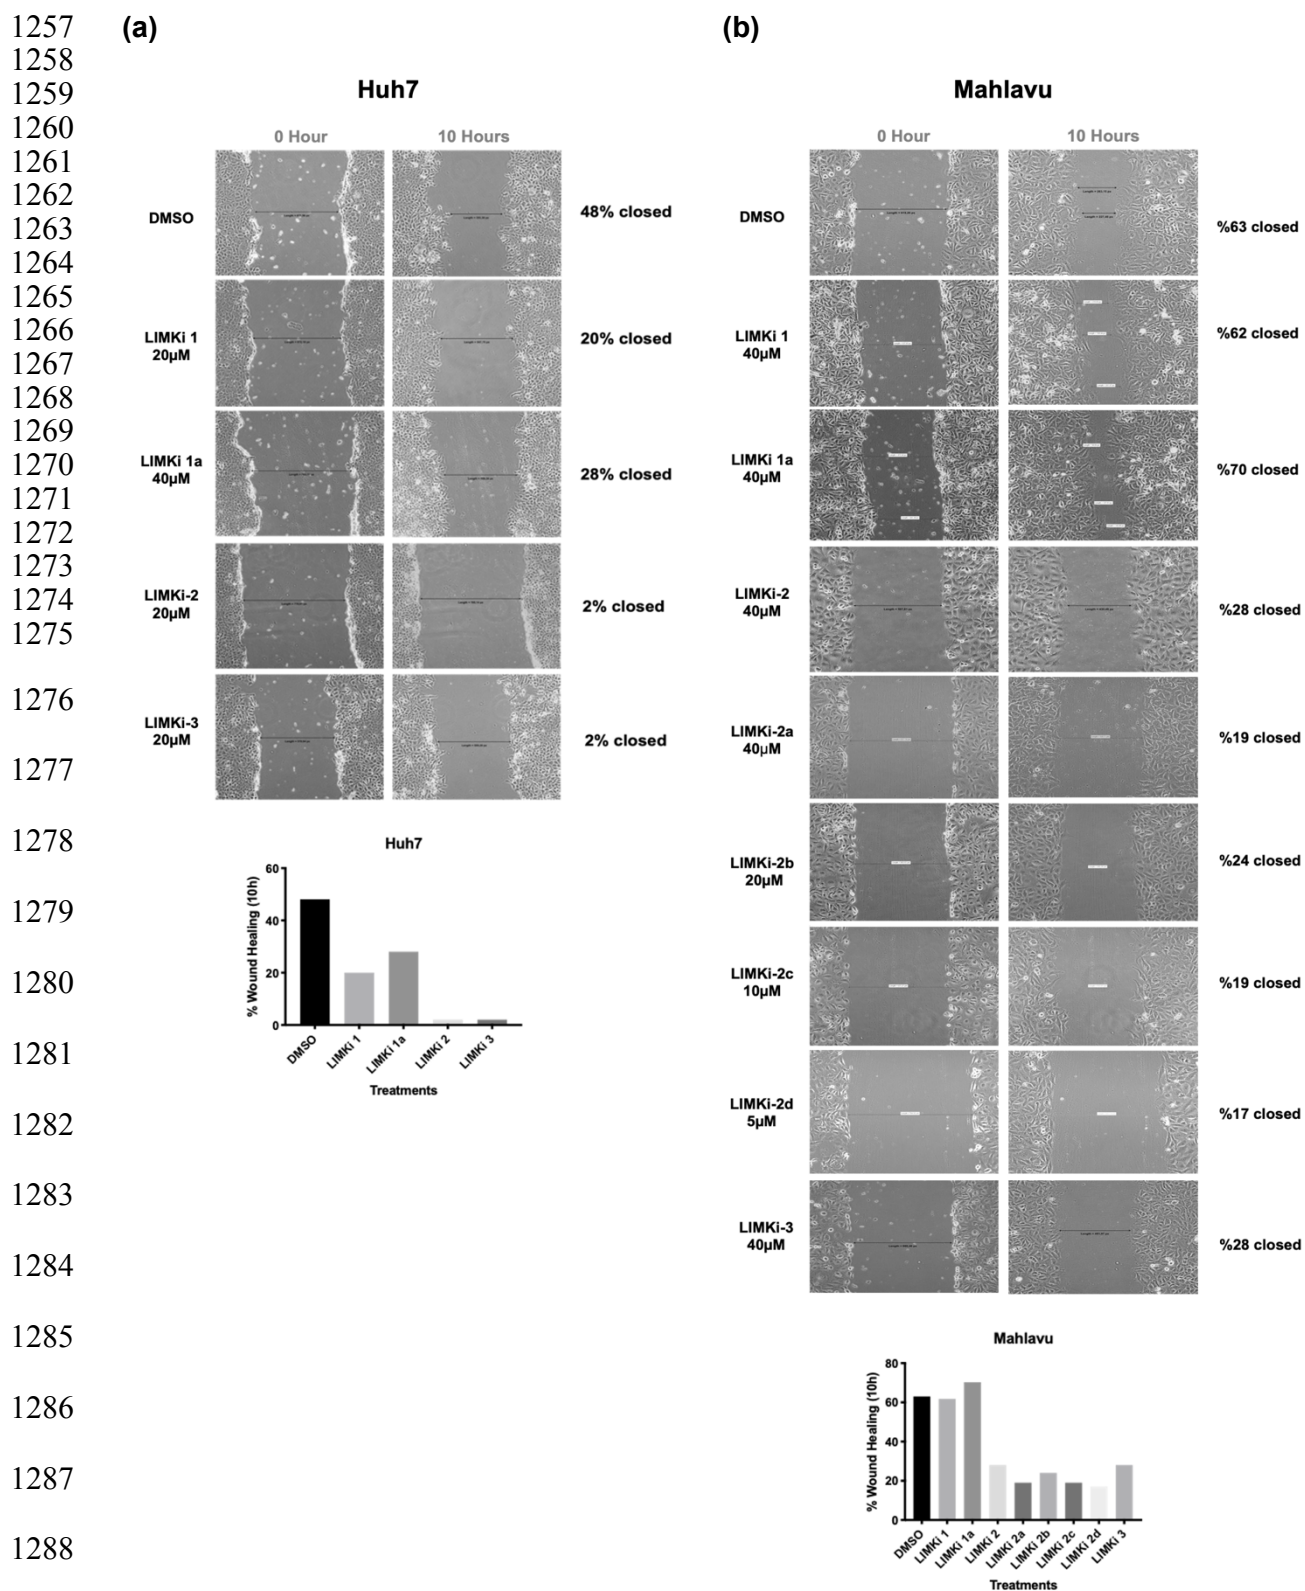

**Figure 5:** Wound healing assay. *In vitro* “wound” was created by a straight-line scratch across the monolayer (a) Huh7, (b) Mahlavu cells. Then cells were treated with indicated concentrations of LIMKi compounds for 10 hours and percent-based wound gap closures were calculated. Bar graphs represent percent-based wound healing for Huh7 and Mahlavu cell lines.

1295 (a)

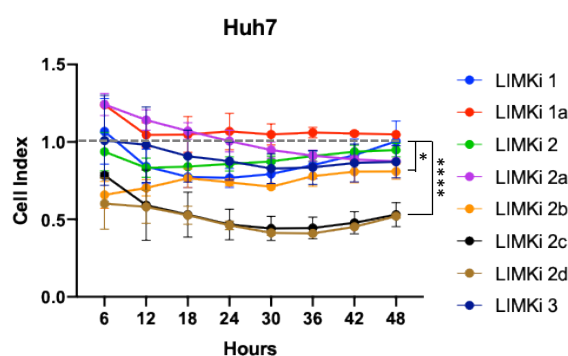

(b)

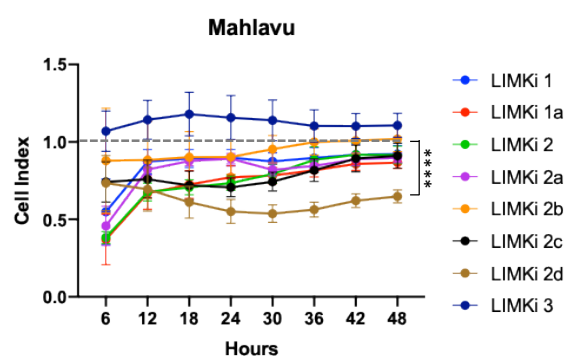

1296

1297 **Figure 6:** Cell invasion assay. Average cell index values are normalized according to  
1298 DMSO, which is represented by the horizontal gray dashed line; (a) Huh7, and (b) Mahlavu  
1299 cell lines, in the presence of LIMK inhibitors. The serum-free media containing 20  $\mu$ M of  
1300 each LIMKi compound were used and invasion progress of cells was monitored via  
1301 xCelligence DP RTCA System (\*: p-value < 0.05, \*\*\*\*: p-value < 0.0001, p-values were  
1302 calculated in comparison to DMSO before the normalization).  
1303

1304

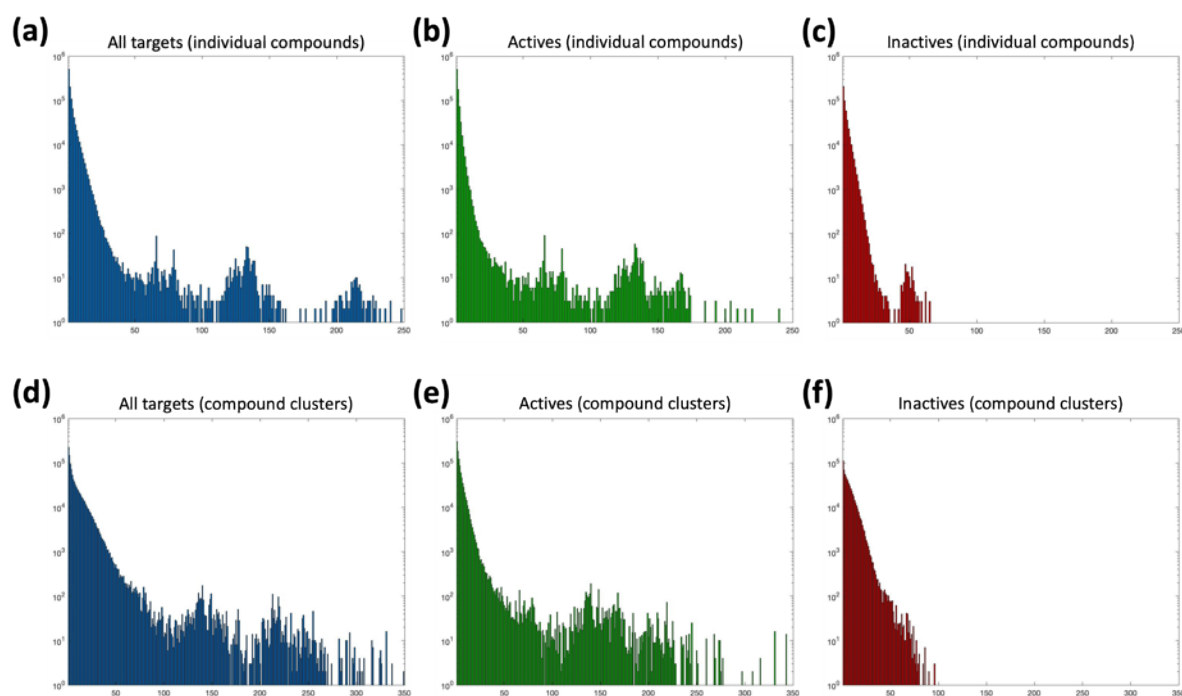

1305

1306

1307 **Figure 7.** Log-scale histograms of the number of individual compounds and compound  
1308 clusters (Y-axis) with the given number of target proteins (X-axis) in our source bioactivity  
1309 dataset; for individual compounds: (a) all targets, (b) active targets, (c) inactive targets; for  
1310 compound clusters: (d) all targets, (e) active targets, (f) inactive targets.

1311

## 1312 **Supplementary Material**

### 1313 **1. Chemical Synthesis of Inhibitor Molecules**

#### 1314 1.1. Synthesis of pyrimidine-based structures 1 and 2 (LIMKi-1 and LIMKi-1a)

##### 1315 **Procedure A:**

1316 To a solution of 2-chloropyrimidine (10 mmol) and ethyl isonipecotate (10 mmol) in MeCN (5  
1317 mL) was added solid potassium carbonate (11 mmol). The resulting reaction mixture was  
1318 heated at 80 °C for 16 hours. After cooling to ambient temperature and evaporation of  
1319 acetonitrile the residue was redissolved in ethyl acetate (25 mL) and extracted with water (3  
1320 x 10 mL). The organic extract was dried over anhydrous sodium sulfate, filtered and  
1321 evaporated to dryness to yield the crude ester product as brown liquid (quantitative yield).

1322 The ester intermediate was dissolved in a mixture of water and methanol (50 mL, 1:1 ratio  
1323 by volume) and treated with solid sodium hydroxide (1.0 g). After heating this mixture at 60  
1324 °C for 3 hours, the reaction mixture was allowed to cool to room temperature. The mixture  
1325 was extracted twice with dichloromethane (2 x 10 mL), the aqueous layer was acidified (1 M  
1326 HCl) and extracted with dichloromethane (2 x 10 mL). The combined layers of this last  
1327 extraction were dried over anhydrous sodium sulfate, filtered and evaporated to dryness  
1328 yielding the corresponding carboxylic acid as colorless oil (92% yield – two steps).

1329 A sample of the carboxylic acid (4 mmol) was dissolved in dry MeCN (1 M solution) and 1,1'-  
1330 carbonyldiimidazole (5 mmol) was added. After heating for 2 hours at 50 °C the mixture was  
1331 split into two equal volumes and treated separately with either 3-methylaniline (2.2 mmol) or  
1332 3-fluoro-4-methylaniline (2.2 mmol). Each sample was heated at 50 °C for a further 3 hours  
1333 and the mixtures then allowed to cool to room temperature leading to precipitation of the  
1334 desired products. Filtration of these solids followed by recrystallization from dichloromethane  
1335 furnished the desired products (LIMKi-1 and LIMKi-1a) in high yield and purity as white  
1336 solids.

##### 1337 ***N*-(3-Fluoro-4-methylphenyl)-1-(pyrimidin-2-yl)piperidine-4-carboxylate, 1 (LIMKi-1):**

1338 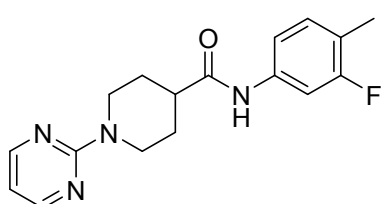 White solid, 83% yield. <sup>1</sup>H NMR (400 MHz, Chloroform-*d*) δ  
1339 8.28 (d, *J* = 4.7 Hz, 2H), 7.66 (s, 1H), 7.43 – 7.35 (m, 1H), 7.10  
1340 – 7.00 (m, 2H), 6.46 (t, *J* = 4.7, 4.7 Hz, 1H), 4.85 – 4.75 (m,  
1341 2H), 2.89 (ddd, *J* = 13.4, 12.1, 2.8 Hz, 2H), 2.48 (tt, *J* = 11.6,  
1342 3.8 Hz, 1H), 2.19 (d, *J* = 2.0 Hz, 3H), 1.99 – 1.90 (m, 2H), 1.85  
1343 – 1.68 (m, 2H). <sup>13</sup>C NMR (101 MHz, Chloroform-*d*) δ 173.1 (C), 161.5 (C), 161.0 (CF, d, *J* =  
1344 245 Hz), 157.7 (2CH), 136.9 (C, d, *J* = 11 Hz), 131.3 (CH, d, *J* = 6 Hz), 120.6 (C, d, *J* = 18



1345 Hz), 115.1 (CH, d,  $J = 3$  Hz), 109.8 (CH), 107.4 (CH, d,  $J = 27$  Hz), 44.6 (CH), 43.3 (2 x CH<sub>2</sub>),  
1346 28.5 (2 x CH<sub>2</sub>), 14.1 (CH<sub>3</sub>, d,  $J = 3$  Hz). <sup>19</sup>F NMR (376 MHz, Chloroform-*d*)  $\delta$  -115.4. HRMS  
1347 (TOF ES+) calculated for C<sub>17</sub>H<sub>20</sub>N<sub>4</sub>OF 315.1621, found 315.1625 ( $\Delta = 1.3$  ppm).

1348 **1-(Pyrimidin-2-yl)-*N*-(*m*-tolyl)piperidine-4-carboxamide, 2 (LIMKi-1a):**

1349 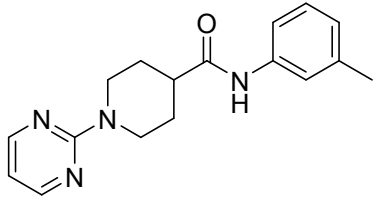 White solid, 79% yield. <sup>1</sup>H NMR (400 MHz, Chloroform-*d*)  $\delta$   
1350 8.28 (d,  $J = 4.7$  Hz, 2H), 7.68 (s, 1H), 7.38 (s, 1H), 7.27 (d,  $J =$   
1351 7.8 Hz, 1H), 7.15 (t,  $J = 7.8$  Hz, 1H), 6.94 – 6.84 (m, 1H), 6.45  
1352 (t,  $J = 4.8$  Hz, 1H), 4.80 (dt,  $J = 13.4, 2.7$  Hz, 2H), 2.88 (ddd,  $J$   
1353 = 13.4, 12.1, 2.8 Hz, 2H), 2.48 (tt,  $J = 11.5, 3.8$  Hz, 1H), 2.27  
1354 (s, 3H), 1.98 – 1.88 (m, 2H), 1.86 – 1.70 (m, 2H). <sup>13</sup>C NMR (101 MHz, Chloroform-*d*)  $\delta$  173.1  
1355 (C), 161.5 (C), 157.7 (2CH), 138.9 (C), 137.8 (C), 128.8 (CH), 125.2 (CH), 120.7 (CH), 117.1  
1356 (CH), 109.8 (CH), 44.6 (CH), 43.3 (2 x CH<sub>2</sub>), 28.5 (2 x CH<sub>2</sub>), 21.5 (CH<sub>3</sub>). HRMS (TOF ES+)  
1357 calculated for C<sub>17</sub>H<sub>21</sub>N<sub>4</sub>O 297.1715, found 297.1720 ( $\Delta = 1.7$  ppm).

1358 1.2. Synthesis of thiadiazole-based structures 3 and 4 (LIMKi-2 and LIMKi-3)

1359 **Procedure B:**

1360 To a suspension of the desired benzamidine hydrochloride hydrate (9 mmol) in  
1361 dichloromethane (15 mL, 0 °C) was added trichloromethyl sulfonylchloride (10 mmol) and  
1362 aqueous sodium hydroxide solution (9 mL, 6 N). After stirring this mixture for 1 hour at 0 °C  
1363 the aqueous layer was separated and piperazine (20 mmol) was added to the organic layer.  
1364 The resulting mixture was stirred at ambient temperature for 12 hours after which water (20  
1365 mL) was added. Extraction of the mixture was performed with dichloromethane (3 x 10 mL)  
1366 and the combined organic layers were dried over anhydrous sodium sulfate, filtered and  
1367 evaporated to yield the desired piperazine adduct as an off-white solid (75% yield).

1368 Solutions of the above piperazine adduct were prepared in two separate vials (2 mmol each)  
1369 in dichloromethane (3 mL each). To each vial was added the corresponding isocyanate  
1370 (e.g., 3-methylphenylisocyanate or 3-methoxyphenylisocyanate; 2.2 mmol). After stirring this  
1371 mixture for 5 hours at ambient temperature a white precipitate formed that was isolated by  
1372 filtration. Recrystallisation from dichloromethane/hexane (1:1) furnished the desired adducts  
1373 (LIMKi-2 and LIMKi-3) as white solids.

1374 Further members of this small library (e.g. LIMKi-2a-d) were prepared in an analogous  
1375 fashion and used after appropriate purifications.

1376



1377 **4-(3-Phenyl-1,2,4-thiadiazol-5-yl)-N-(m-tolyl)piperazine-1-carboxamide, 3 (LIMKi-2):**

1378 White solid, 60% yield. <sup>1</sup>H NMR (700 MHz, DMSO-*d*<sub>6</sub>)  
1379  $\delta$  8.63 (s, 1H), 8.13 – 8.07 (m, 2H), 7.45 (m, 3H), 7.28  
1380 (d, *J* = 2.0 Hz, 1H), 7.25 (dd, *J* = 8.1, 2.2 Hz, 1H), 7.10  
1381 (t, *J* = 7.8 Hz, 1H), 6.76 – 6.72 (m, 1H), 3.65 – 3.55 (m,  
1382 8H), 2.23 (s, 3H). <sup>13</sup>C NMR (176 MHz, DMSO-*d*<sub>6</sub>)  $\delta$   
1383 185.2 (C), 169.5 (C), 155.3 (C), 140.7 (C), 137.8 (C), 133.3 (C), 130.5 (CH), 129.1 (2 x CH),  
1384 128.6 (CH), 128.0 (2 x CH), 123.1 (CH), 120.7 (CH), 117.3 (CH), 48.8 (2 x CH<sub>2</sub>), 43.4 (2 x  
1385 CH<sub>2</sub>), 21.6 (CH<sub>3</sub>). HRMS (TOF ES+) calculated for C<sub>20</sub>H<sub>22</sub>N<sub>5</sub>OS 380.1545, found 380.1532 ( $\Delta$   
1386 = 3.4 ppm).

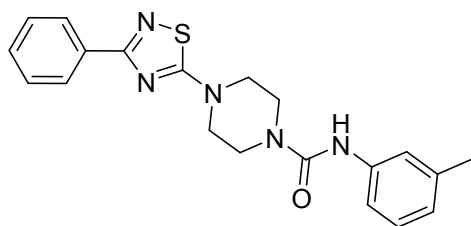

1387 **N-(3-Methoxyphenyl)-4-(3-phenyl)-1,2,4-thiadiazol-5-yl)piperazine-1-carboxamide, 4**  
1388 **(LIMKi-3):**

1389 White solid, 66% yield. <sup>1</sup>H NMR (700 MHz,  
1390 Chloroform-*d*)  $\delta$  8.20 – 8.15 (m, 2H), 7.46 – 7.38  
1391 (m, 3H), 7.18 (t, *J* = 8.1 Hz, 1H), 7.07 (t, *J* = 2.3 Hz,  
1392 1H), 6.87 (ddd, *J* = 8.0, 2.1, 0.9 Hz, 1H), 6.78 (d, *J*  
1393 = 3.5 Hz, 1H), 6.61 (ddd, *J* = 8.3, 2.5, 0.9 Hz, 1H),  
1394 3.76 (s, 3H), 3.63 (dd, *J* = 7.2, 3.8 Hz, 4H), 3.62 – 3.58 (m, 4H). <sup>13</sup>C NMR (176 MHz,  
1395 Chloroform-*d*)  $\delta$  185.1 (C), 170.4 (C), 160.2 (C), 154.9 (C), 139.9 (C), 133.2 (C), 130.0 (CH),  
1396 129.6 (CH), 128.5 (2 x CH), 128.0 (2 x CH), 112.5 (CH), 109.2 (CH), 106.3 (CH), 55.3 (CH<sub>3</sub>),  
1397 48.3 (2 x CH<sub>2</sub>), 43.3 (2 x CH<sub>2</sub>). HRMS (TOF ES+) calculated for C<sub>20</sub>H<sub>22</sub>N<sub>5</sub>O<sub>2</sub>S 396.1494, found  
1398 396.1490 ( $\Delta$  = 1.0 ppm).

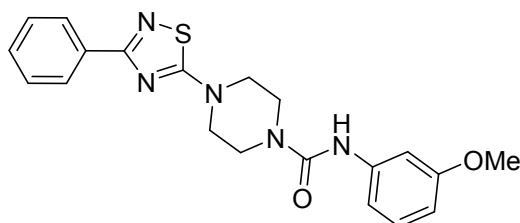

1399  
1400
